1

2

3

4 Alkaloid and acetogenin-rich fraction from *Annona crassiflora* fruit peel

5 inhibits proliferation and migration of human liver cancer HepG2 cells

6

7

8 Allisson B. Justino<sup>1</sup>, Rodrigo M. Florentino<sup>2</sup>, Andressa França<sup>2,3</sup>, Antonio C. M. L.

9 Filho<sup>2</sup>, Rodrigo R. Franco<sup>1</sup>, André L. Saraiva<sup>1</sup>, Matheus C. Fonseca<sup>4</sup>, Maria F. Leite<sup>2</sup>,

10 Foued S. Espindola<sup>1\*</sup>

11

12

13 <sup>1</sup>Institute of Biotechnology, Federal University of Uberlandia, Av. Pará, 1720, 38400-

14 902, Uberlândia/MG – Brazil.

15 <sup>2</sup>Department of Physiology and Biophysics, Federal University of Minas Gerais, Av.

16 Antônio Carlos, 6627, 31270-901, Belo Horizonte/MG – Brazil.

17 <sup>3</sup>Department of Molecular Medicine, Federal University of Minas Gerais, Av. Antônio

18 Carlos, 6627, 31270-901, Belo Horizonte/MG – Brazil.

19 <sup>4</sup>Brazilian Biosciences National Laboratory (LNBio), Brazilian Center for Research in

20 Energy and Materials (CNPEM), Giuseppe Maximo Scolfaro St, 10000, 13083-970,

21 Campinas/SP, Brazil.

22

23

24 \*Corresponding author:

25 E-mail: [foued@ufu.br](mailto:foued@ufu.br) (FSE)

## 26 **Abstract**

27 Plant species from Annonaceae are commonly used in traditional medicine to treat  
28 various cancer types. This study aimed to investigate the antiproliferative potential of an  
29 alkaloid and acetogenin-rich fraction from the fruit peel of *Annona crassiflora* in HepG2  
30 cells. A liquid-liquid fractionation was carried out on the ethanol extract of *A. crassiflora*  
31 fruit peel in order to obtain an alkaloid and acetogenin-rich fraction (AF-Ac).  
32 Cytotoxicity, proliferation and migration were evaluated in the HepG2 cells, as well as  
33 the proliferating cell nuclear antigen (PCNA), vinculin and epidermal growth factor  
34 receptor (EGFR) expression. In addition, intracellular Ca<sup>2+</sup> was determined using Fluo4-  
35 AM and fluorescence microscopy. First, 9 aporphine alkaloids and 4 acetogenins that had  
36 not yet been identified in the fruit peel of *A. crassiflora* were found in AF-Ac. The  
37 treatment with 50 µg/mL AF-Ac reduced HepG2 cell viability, proliferation and  
38 migration ( $p < 0.001$ ), which is in accordance with the reduced expression of PCNA and  
39 EGFR levels ( $p < 0.05$ ). Furthermore, AF-Ac increased intracellular Ca<sup>2+</sup> in the HepG2  
40 cells, mobilizing intracellular calcium stores, which might be involved in the anti-  
41 migration and anti-proliferation capacities of AF-Ac. Our results support the growth-  
42 inhibitory potential of AF-Ac on HepG2 cells and suggest that this effect is triggered, at  
43 least in part, by PCNA and EGFR modulation and mobilization of intracellular Ca<sup>2+</sup>. This  
44 study showed biological activities not yet described for *A. crassiflora* fruit peel, which  
45 provide new possibilities for further *in vivo* studies to assess the antitumoral potential of  
46 *A. crassiflora*, especially its fruit peel.

47

48

49

50

## 51 **Introduction**

52 Cancer represents one of the main challenges for medicine being one of the most  
53 critical problems of public health in the world. Hepatocellular carcinoma (HCC) is the  
54 seventh most frequently occurring cancer and the fourth most common cause of cancer  
55 mortality, with over half a million new cases diagnosed annually worldwide [1]. Hepatitis  
56 B and C virus and excessive alcohol consumption are important risk factors for HCC [2].  
57 In addition to its high incidence, this tumor is usually diagnosed at advanced stages, which  
58 hampers effective treatment. Thus, the search of new agents capable of controlling the  
59 development of hepatocellular tumor is important to reduce the mortality caused by this  
60 disease.

61 Thus, over the past decade, numerous studies have shown that compounds derived  
62 from plants are potentially interesting for therapeutic interventions in various cancer types  
63 due to their great diversity of chemical structures, and better drug-like properties  
64 compared to the synthetic compounds [3-5]. Examples include plant-derived alkaloids,  
65 specifically aporphine alkaloids, which had previously demonstrated antitumor effects in  
66 different cancer cell models [5-8]. Acetogenins, a class of polyketide compounds found  
67 in plants of the Annonaceae family, have also been reported to possess apoptosis-inducing  
68 effects [9]. *Annona crassiflora* Mart., an Annonaceae species common to the Brazilian  
69 Savanna, where it is known as araticum, might be a potential source of acetogenins and  
70 aporphine alkaloids [10-12]. Different parts of this species such as bark, leaf, fruit and  
71 seed have been widely used in folk medicine for the treatment of inflammation, microbial  
72 infections, malaria, venereal diseases, snakebites, diarrhea, and as cancer chemopreventive  
73 agents [13-15].

74 Recently, methanolic extracts of leaves and seeds of *A. crassiflora* have shown *in*  
75 *vitro* antiproliferative properties in leukemia, glioblastoma, lung and ovarian cancer cell

76 lines [16]. Furthermore, a study done by Silva, Alves (17) showed that a hexane fraction  
77 from the crude extract of *A. crassiflora* leaf had cytotoxic effect on cervical cancer cells  
78 by acting through DNA damage, apoptosis via intrinsic pathway and mitochondrial  
79 membrane depolarization [17]. However, scientific reports demonstrating antitumoral  
80 activities of the fruit peel of this species are still limited.

81 Previously, a pre-purification of the ethanol extract of *A. crassiflora* fruit peel was  
82 conducted, resulting in an alkaloid (CH<sub>2</sub>Cl<sub>2</sub> fraction)-enriched fraction [10]. From the  
83 CH<sub>2</sub>Cl<sub>2</sub> fraction, stephalagine, an aporphine alkaloid, was isolated and characterized [11].  
84 It is worth mentioning here that the only biological activities described for this alkaloid  
85 are its antinociceptive feature [10] and potential inhibitory effect against pancreatic lipase  
86 [11]. In this context, in this study, we first identified the main alkaloids and acetogenins  
87 present in the alkaloid and acetogenin-rich fraction from *A. crassiflora* fruit peel, named  
88 here as AF-Ac. Then, we evaluated the antiproliferative potential of AF-Ac in HepG2  
89 cells, exploring the possible involvement of the proliferating cell nuclear antigen  
90 (PCNA), vinculin and epidermal growth factor receptor (EGFR), as well as the  
91 intracellular calcium (Ca<sup>2+</sup>) signaling.

92

## 93 **Materials and methods**

### 94 **Reagents**

95 Ethanol (>98%), *n*-hexane (99%), dichloromethane (99.5%), ethyl acetate  
96 (99.5%), *n*-butanol (≥99.5%), methanol (≥99.8%), hydrochloric acid (37%), ammonium  
97 hydroxide (30%) and formic acid (98%) were purchased from Vetec Quimica Fina Ltda  
98 (Duque de Caxias, Rio de Janeiro, Brazil). Fluo-4/AM was purchased from Invitrogen  
99 (Eugene, USA). Enhanced chemiluminescence (ECL-plus Western Blotting Detection  
100 System) and peroxidase conjugated antibodies were purchased from Amersham

101 Biosciences (Buckinghamshire, UK). All other reagents and standards were purchased  
102 from Sigma Aldrich Chemical Co. (St. Louis, MO, USA). Milli-Q Academic Water  
103 Purification System (Millipore Corp., Billerica, MA) was used to obtain the ionexchanged  
104 water. All reagents were of analytical grade.

105

## 106 **Plant material and alkaloid and acetogenin-rich fraction**

107 *A. crassiflora* fruits were collected in the northern region of Minas Gerais State,  
108 Brazil, in March 2017. Voucher specimens (HUFU68467) were deposited in the  
109 herbarium of the Federal University of Uberlandia. The peels were quickly removed from  
110 the fresh fruits and crushed, and the obtained powder was stored at -20 °C until the  
111 moment of extraction. The dried and powdered peels (1.0 kg) were extracted for three  
112 days by maceration with 6 L of 98% ethanol at 25 °C. After filtration, ethanol was  
113 removed under reduced pressure using a rotary evaporator (Bunchi Rotavapor R-210,  
114 Switzerland) at 40 °C. This process was repeated until the last extract turned colorless  
115 (54.2 g, 5.42%). The alkaloid and acetogenin-rich fraction (AF-Ac) was obtained by a  
116 liquid-liquid extraction [10]. Briefly, the ethanol extract (10.0 g) was diluted in  
117 methanol:water (9:1, v/v, 200 mL), filtered and extracted using *n*-hexane (4 × 200 mL,  
118 0.17 g), dichloromethane (4 × 200 mL, 0.31 g), ethyl acetate (4 x 200 mL, 2.71 g) and *n*-  
119 butanol (4 x 200 mL, 2.65 g). Additionally, an aqueous fraction (0.61 g) was obtained.  
120 All the phases were concentrated under reduced pressure at 40 °C, frozen and lyophilized  
121 (L101, Liobras, SP, Brazil). To confirm the presence of alkaloids, the fractions were  
122 analyzed by thin layer chromatography (TLC) (S1 Fig). The alkaloids and acetogenins  
123 were concentrated in the dichloromethane fraction. The resulting alkaloid and acetogenin-  
124 rich fraction was maintained at -20°C until use.

125

126 **Ultra-High-Performance Liquid Chromatography -**  
127 **Electrospray Ionization-tandem Mass Spectrometry (UHPLC-**  
128 **ESI/MS<sup>n</sup>)**

129 The UHPLC-ESI/MS<sup>n</sup> analysis of AF-Ac was done on an Agilent Q-TOF (model  
130 6520) apparatus (Agilent, Santa Clara, CA, USA), operating in the positive mode.  
131 Methanol:water (4:1) was used as solvent system and the AF-Ac infused at the source at  
132 200  $\mu$ L/h. The parameters of chromatography were: Agilent Zorbax model 50 x 2.1 mm  
133 column, particles of 1.8  $\mu$ m and pore diameter of 110 Å, mobile phase: water (0.1%  
134 formic acid, v/v) (A) and methanol (B). The gradient solvent system for B was: 2% (0  
135 min); 98% (0-15 min); 100% (15-17 min); 2% (17-18 min); 2% (18-22 min), 0.35 mL/min  
136 and detection at 280 and 360 nm. The parameters of ionization were: 58 psi nebulizer  
137 pressure, 8 L/min N<sub>2</sub> at 220 °C, and 4.5 kVa energy in the capillary. Sequential mass  
138 spectrometry (MS/MS) analyses were done with different collision energies (5-30 eV).  
139 The peaks and spectra were processed using the Agilent's MassHunter Qualitative  
140 Analysis (B07.00) software and tentatively identified by comparing its retention time  
141 (Rt), error values (ppm) and mass spectrum with reported data [18].

142

143 **Cell culture**

144 Human hepatocellular carcinoma cell line HepG2 was obtained from the American  
145 Type Culture Collection (ATCC HB-8065). HepG2 cells were cultured at 37°C in 5%  
146 CO<sub>2</sub> in DMEM (GIBCO™, Invitrogen Corp., Carlsbad, CA) supplemented with 10%  
147 fetal bovine serum (FBS), 4.5 g/L glucose, 1 mM sodium pyruvate, 50 units/mL  
148 penicillin, and 50 mg/mL streptomycin. Prior to addition of the treatments, cells were  
149 grown to 80-90% confluency and synchronized by incubating in serum-free medium

150 (100% DMEM) for 24 h. The human peripheral blood mononuclear cells (PBMC) were  
151 purified using Histopaque-1077. All experimental procedures were carried out in  
152 accordance with the Code of Ethics of the World Medical Association (Declaration of  
153 Helsinki) and were approved by the Institutional Review Board of the Federal University  
154 of Uberlandia (no. 1.908.151) The informed consent was obtained from all subjects.  
155 Briefly, in conical tube 3 mL of EDTA-anticoagulated whole blood from three healthy  
156 volunteers was carefully layered onto 3 mL of Histopaque-1077 and then centrifuged at  
157 400 xg for 30 min. PBMC were collected in plasma/Hitopaque-1077 interface and washed  
158 with 10 mL of Hank's Balanced Salt Solution without calcium. Cells were suspended in  
159 RPMI-1640 supplemented with 10% of fetal bovine serum (Gibco), 2 mM L-glutamine,  
160 100 U/mL penicillin and 100 µg/mL streptomycin. Semi-confluent (80% to 90%) cell  
161 cultures were used in all studies. The HepG2 cells were plated and then, 24 h later the  
162 AF-Ac treatment was done. The cells were then incubated with various concentrations (0-  
163 500 µg/mL) of AF-Ac for 24 and/or 48 h. Control group consisted of cells without  
164 addition of AF-Ac incubated only with vehicle (medium containing 0.05% DMSO). After  
165 24 and/or 48 h, the cells and medium were collected. Protein contents in cells and medium  
166 were quantified by Bradford method [19].

167

## 168 **Cell viability**

169 HepG2 and PBMC cells were seeded in 96-well microplate at  $0.2 \times 10^6$  cells/well  
170 and treated with AF-Ac (diluted in DMEM medium containing 0.05% DMSO for HepG2  
171 cells or diluted in RPMI-1640 medium containing 0.05% DMSO for PBMC cells) or  
172 vehicle (control, DMEM medium containing 0.05% DMSO for HepG2 cells; RPMI-1640  
173 medium containing 0.05% DMSO for PBMC cells) for 24 h. Then, 100 µL of 5 mg/mL  
174 (3-(4,5-dimethylthiazolyl-2)-2,5-diphenyltetrazolium bromide) solution was incubated

175 with the supernatant at 37 °C for 2 h in 5% CO<sub>2</sub>. Next, dimethyl sulfoxide (DMSO) was  
176 added and the cell viability was analyzed by absorbance of the purple formazan from  
177 viable cells at 570 nm (Molecular Devices, Menlo Park, CA, USA).

178

## 179 **Cellular proliferation assay**

180 HepG2 cells were grown in 24 well-plates. FBS was removed for overnight and  
181 then the cells were treated with 50 µg/mL AF-Ac or vehicle (control, DMEM medium  
182 containing 0.05% DMSO). *In vitro* cell proliferation assay was assessed by manual  
183 counting in Neubauer chamber using optic microscopy at 6, 12, 24 and 48 h, as previously  
184 described [20].

185

## 186 **Migration assay**

187 HepG2 cells were grown in 12-well plates and treated with 50 µg/mL AF-Ac or  
188 vehicle (control, DMEM medium containing 0.05% DMSO) for 48 h. Migration assay  
189 was performed as previously described [21]. The wound was achieved by scratching a  
190 pipette tip across the cell monolayer (approximately 1.3 mm in width); 1 µM hydroxyurea  
191 was added to prevent the proliferation [22]. The wound area was measured using the  
192 Northern Eclipse (Empix, Mississauga, Canada) software, and the percentage of wound  
193 closure at each time point was derived by the formula:  $(1 - [\text{current wound size}/\text{initial}$   
194  $\text{wound size}]) \times 100$ .

195

## 196 **Western blot analyses**

197 HepG2 cell lysates in SDS-sample buffer containing an additional 100 mM Tris-  
198 HCl pH 8.0 and 25% glycerol were boiled for 5 min and equal amounts of total protein



199 (25 µg/mL) were separated by 12% SDS-PAGE gel. To better take advantage of the  
200 western blot, in which triplicates of each sample are present, the whole membranes were  
201 cut into strips for the different antibodies tested. The blots were cut prior to hybridization  
202 with antibodies. Images of all blots as they are, and all replicates performed are shown in  
203 S16 Fig. For protein detection, specific primary antibodies against proliferating cell  
204 nuclear antigen PCNA (mouse, 1:1,000;), vinculin (mouse, 1:1,000, Cell Signaling  
205 Technology), epidermal growth factor receptor EGFR (mouse, 1:1,000 Santa Cruz  
206 Biotechnology, Dallas, TX) and  $\beta$ -actin (mouse, 1:1,000; Santa Cruz Biotechnology,  
207 Dallas, TX) were used. The primary antibody incubation proceeded for 2 h at room  
208 temperature. After being washed, blots were incubated with horseradish peroxidase-  
209 conjugated specific secondary antibody (anti-mouse or anti-rabbit, 1:5,000; Sigma-  
210 Aldrich) at room temperature for 1 h. Immune detection was carried out using enhanced  
211 chemiluminescence (ECL plus; Amersham Biosciences) [23]. Western blot digital images  
212 (8-bit) were used for densitometric analysis using ImageJ (National Institutes of Health,  
213 Bethesda, MD).

214

## 215 **Immunofluorescence**

216 Confocal microscopy examination of immunofluorescence in HepG2 cells was  
217 performed as described [24]. Cells were seeded onto 6-well culture dishes and incubated  
218 with 50 µg/mL AF-Ac or vehicle (control, DMEM medium containing 0.05% DMSO)  
219 for 24 h. Then, cells were fixed with 4% paraformaldehyde, permeabilized with PBS  
220 1X/Triton 0.5% and blocked with PBS (10% BSA, 0.5% Triton 0.5% and 5% goat serum)  
221 for 1 h. Cells were incubated with anti-EGFR antibody (anti-mouse, 1:100; Abcam, MA,  
222 USA) for 2 h at room temperature, followed by incubation with anti-mouse secondary  
223 antibody conjugated with Alexa 488 (1:500; Life Technologies) for 1 h. Isotype control

224 was used to assess non-specific binding under the same experimental conditions. Images  
225 were obtained using a Zeiss LSM 510 confocal microscope (Thornwood, NY, USA)  
226 equipped with a 63×/1.4 NA objective with excitation laser at 488 nm and emission  
227 bandpass filter at 505-550 nm.

228

## 229 **Detection of Ca<sup>2+</sup> signals**

230 Intracellular Ca<sup>2+</sup> was monitored in individual cells by time lapse confocal  
231 microscopy, as described previously [25]. Briefly, HepG2 cells were incubated with Fluo-  
232 4/AM (6 μM) for 30 min at 37 °C in 5% CO<sub>2</sub> in HEPES buffer with or without 10 mM  
233 EGTA. Then, coverslips containing cells were transferred to a perfusion chamber on the  
234 stage of the Zeiss LSM510 confocal imaging system equipped with a Kr-Ar laser. Nuclear  
235 and cytosolic Ca<sup>2+</sup> signals were monitored in individual cells during stimulation with 50  
236 μg/mL AF-Ac using a ×63, 1.4 NA objective lens. Fluo-4/AM was excited at 488 nm and  
237 observed at 505-550 nm. Changes in fluorescence were normalized by the initial  
238 fluorescence (F<sub>0</sub>) and were expressed as  $(F/F_0) \times 100$ . During the 600 s for the calcium  
239 signalling experiments, the cells were perfused with HEPES solution without fetal bovine  
240 serum, growth factor and molecules that can themselves alter the calcium signalling.

241

## 242 **Statistical analysis**

243 The graphics and statistical analyzes were done using SigmaPlot (Systat Software,  
244 Point Richmond, USA) and Prism (GraphPad Software, San Diego, USA). The data were  
245 expressed as mean ± SD and the statistical significance was tested using Student's t test,  
246 one-way or two-way ANOVA followed by Dunnett or Bonferroni test. *p* value < 0.05 was  
247 taken to indicate statistical significance.

248

## 249 Results

250

### 251 Identification of alkaloids and acetogenins by Ultra-High- 252 Performance Liquid Chromatography-Electrospray 253 Ionization-tandem Mass Spectrometry (UHPLC-ESI/MS<sup>n</sup>)

254 The alkaloid and acetogenin profile of AF-Ac was performed by UHPLC-ESI-MS<sup>n</sup>.  
255 The presence of ions  $m/z$  attributed to alkaloids and acetogenins was confirmed in the  
256 positive mode by high resolution “zoom scan” analysis. Isopiline, isoboldine,  
257 isocorydine, anonaine, nuciferine, xylopine, stephalagine, liriodenine and  
258 atherospermidine were the alkaloids found in AF-Ac [11, 26-31], whereas bullatanocin,  
259 bullatacin/squamocin, annomontacin and desacetyluvaricin/ isodesacetyluvaricin were  
260 the acetogenins found in AF-Ac [32] (Fig 1 and Table 1). The chemical structures of the  
261 alkaloids and acetogenins identified in the AF-Ac fraction are shown in Figs 2 and 3,  
262 respectively. The sequential mass spectra can be found as supplementary material online  
263 (S2-S14 Fig).

264

265 **Fig 1. Chromatogram of the alkaloid and acetogenin-rich fraction from *Annona*  
266 *crassiflora* fruit peel (AF-Ac) by HPLC-ESI-MS/MS (positive mode).**

267

268 **Table 1.** Alkaloids and acetogenins identified in the alkaloid and acetogenin-rich fraction  
269 from *Annona crassiflora* fruit peel (AF-Ac) by UHPLC-ESI/MS<sup>n</sup> (positive mode).

| Peak | Tentative identification <sup>a</sup><br>(alkaloid) | Retention time (min) | Formula [M+H] <sup>+</sup> | Mass calculated for [M+H] <sup>+</sup> | $m/z$ of [M+H] <sup>+</sup> | Error (ppm) | $m/z$ of fragments | References |
|------|-----------------------------------------------------|----------------------|----------------------------|----------------------------------------|-----------------------------|-------------|--------------------|------------|
|------|-----------------------------------------------------|----------------------|----------------------------|----------------------------------------|-----------------------------|-------------|--------------------|------------|

|    |                                                                  |                                 |                                       |                                                   |                                      |                        |                                                                                                                                  |                   |
|----|------------------------------------------------------------------|---------------------------------|---------------------------------------|---------------------------------------------------|--------------------------------------|------------------------|----------------------------------------------------------------------------------------------------------------------------------|-------------------|
| 1  | Isopiline                                                        | 4.4                             | $C_{18}H_{20}NO_3^+$                  | 298.1437                                          | 298.1448                             | 3.68                   | 281, 270,<br>266, 250                                                                                                            | [26]              |
| 2  | Isoboldine                                                       | 4.6                             | $C_{19}H_{22}NO_4^+$                  | 328.1518                                          | 328.1525                             | 2.13                   | 297, 265,<br>178, 151                                                                                                            | [27]              |
| 3  | Isocorydine                                                      | 4.7                             | $C_{20}H_{24}NO_4^+$                  | 342.1699                                          | 342.1699                             | 0.00                   | 311, 296,<br>279, 265                                                                                                            | [28]              |
| 4  | Anonaine                                                         | 6.0                             | $C_{17}H_{16}NO_2^+$                  | 266.1166                                          | 266.1169                             | 1.13                   | 249, 234,<br>219, 191                                                                                                            | [29]              |
| 5  | Xylopine                                                         | 6.5                             | $C_{18}H_{18}NO_3^+$                  | 296.1227                                          | 296.1228                             | 0.34                   | 281, 249,<br>221, 206                                                                                                            | [30]              |
| 6  | Stephalagine                                                     | 7.0                             | $C_{19}H_{20}NO_3^+$                  | 310.1472                                          | 310.1470                             | 0.96                   | 279, 264,<br>234, 178                                                                                                            | [11]              |
| 7  | Nuciferine                                                       | 7.6                             | $C_{19}H_{22}NO_2^+$                  | 296.1320                                          | 296.1323                             | 1.01                   | 279, 264,<br>249, 234                                                                                                            | [26]              |
| 8  | Liriodenine                                                      | 10.2                            | $C_{17}H_{10}NO_3^+$                  | 276.0653                                          | 276.0655                             | 0.72                   | 259, 251,<br>248, 232                                                                                                            | [29]              |
| 9  | Atherospermidine                                                 | 10.7                            | $C_{18}H_{12}NO_4^+$                  | 306.0758                                          | 306.0758                             | 0.00                   | 291, 263,<br>251, 235                                                                                                            | [31]              |
|    | <b>Tentative<br/>identification<sup>†</sup><br/>(acetogenin)</b> | <b>Retention<br/>time (min)</b> | <b>Formula<br/>[M+Na]<sup>+</sup></b> | <b>Mass calculated<br/>for [M+Na]<sup>+</sup></b> | <b>m/z of<br/>[M+Na]<sup>+</sup></b> | <b>Error<br/>(ppm)</b> | <b>m/z of<br/>fragments</b>                                                                                                      | <b>References</b> |
|    |                                                                  |                                 |                                       |                                                   |                                      |                        | 639 [M+H] <sup>+</sup> ,<br>621 [M+H-<br>H <sub>2</sub> O] <sup>+</sup> ,<br>585 [M+H-<br>3H <sub>2</sub> O] <sup>+</sup> , 567  |                   |
| 10 | Bullatanocin                                                     | 12.8                            | $C_{37}H_{66}O_8Na^+$                 | 661.465                                           | 661.4662                             | 1.81                   | [M+H-<br>4H <sub>2</sub> O] <sup>+</sup> ,<br>549 [M+Na-<br>112] <sup>+</sup> , 531<br>[M+NA-<br>6H <sub>2</sub> O] <sup>+</sup> | [32]              |
| 11 | Bullatacin/squamocin                                             | 13.3                            | $C_{37}H_{66}O_7Na^+$                 | 645.4701                                          | 645.4707                             | 0.92                   | 569 [M+H-<br>3H <sub>2</sub> O] <sup>+</sup> , 551<br>[M+H-<br>4H <sub>2</sub> O] <sup>+</sup> ,                                 | [32]              |

|    |                                            |      |                                                                |          |          |       |                                                                                                 |      |
|----|--------------------------------------------|------|----------------------------------------------------------------|----------|----------|-------|-------------------------------------------------------------------------------------------------|------|
|    |                                            |      |                                                                |          |          |       | 533 [M+H-<br>5H <sub>2</sub> O] <sup>+</sup> , 523<br>[M+Na-112] <sup>+</sup>                   |      |
|    |                                            |      |                                                                |          |          |       | 607 [M+H-<br>H <sub>2</sub> O] <sup>+</sup> , 589<br>[M+H-<br>2H <sub>2</sub> O] <sup>+</sup> , | [32] |
| 12 | Annomontacin                               | 13.5 | C <sub>37</sub> H <sub>68</sub> O <sub>7</sub> Na <sup>+</sup> | 647.4857 | 647.4855 | -0.30 | 535 [M+Na-<br>112] <sup>+</sup>                                                                 |      |
|    |                                            |      |                                                                |          |          |       | 589 [M+H-<br>H <sub>2</sub> O] <sup>+</sup> , 571<br>[M+H-<br>2H <sub>2</sub> O] <sup>+</sup> , | [32] |
| 13 | Desacetyluvaricin/<br>isodesacetyluvaricin | 14.3 | C <sub>37</sub> H <sub>66</sub> O <sub>6</sub> Na <sup>+</sup> | 629.4752 | 629.4750 | -0.31 | 553 [M+H-<br>3H <sub>2</sub> O] <sup>+</sup> , 535<br>[M+H-<br>4H <sub>2</sub> O] <sup>+</sup>  |      |

270 <sup>a</sup>Tentative identification of compounds was based on published literature of *Annona*  
271 species.

272

273 **Fig 2. Chemical structures of the aporphine alkaloids identified in the AF-Ac**  
274 **fraction from *A. crassiflora* fruit peel.**

275

276 **Fig 3. Chemical structures of the acetogenins identified in the AF-Ac fraction from**  
277 ***A. crassiflora* fruit peel.**

278

## 279 **AF-Ac reduces HepG2 cell viability**

280 Fig 4 shows cell viability of HepG2 and PBMC cells treated with different  
281 concentrations of AF-Ac for 24 h. AF-Ac was able to reduce HepG2 cell viability at 50,  
282 250 and 500 µg/mL, compared to untreated control cells (cells treated only with vehicle)  
283 (25.7 ± 2.8, 77.0 ± 1.8 and 83.3 ± 1.3% of reductions, respectively,  $p < 0.001$ ) (Fig 4A).

284 However, AF-Ac was cytotoxicity for PBMC cells only at 500 µg/mL (Fig 4B). As was  
285 observed with PBMC cells, the AF-Ac fraction at a concentration of 50 µg/mL did not  
286 affect the cell viability of fibroblasts treated for 24 h (S15 Fig).

287

288 **Fig 4. Cell viability of HepG2 (A) and PBMC (B) cells treated with the alkaloid and**  
289 **acetogenin-rich fraction of *Annona crassiflora* fruit peel (AF-Ac) or vehicle (control,**  
290 **cells treated with DMEM medium containing 0.05% DMSO for HepG2 cells or**  
291 **RPMI-1640 containing 0.05% DMSO for PBMC cells). Results (mean ± SD, n = 3)**  
292 **expressed as the percentage of viable cells compared to the vehicle group.**  
293 **Significance levels are indicated by \*\*\* $p < 0.001$  when compared to control (one-way**  
294 **ANOVA and Dunnett as posttest).**

295

## 296 **AF-Ac reduces HepG2 cell proliferation**

297 We investigated whether AF-Ac presents antiproliferative effect in HepG2 cells since  
298 it reduced its viability. Incubation of HepG2 cells with 50 µg/mL AF-Ac for 48 h led to  
299 a reduction in cell proliferation ( $75.2 \pm 10.5\%$ ,  $p < 0.001$ ) (Fig 5A). This result was similar  
300 to cells in medium with 0% fetal bovine serum. After 24 h incubation with AF-Ac, the  
301 expression of PCNA, a marker of cell proliferation, in HepG2 cells was analyzed by  
302 Western blotting. In accordance with the cell proliferation assay, AF-Ac at the dose of 50  
303 µg/mL decreased PCNA expression ( $p < 0.05$ ) (Figs 5B and 5C).

304

305 **Fig 5. Cell growth assay of HepG2 cells at 6, 12, 24 and 48 h after stimulation with**  
306 **50 µg/mL AF-Ac or vehicle (control, cells treated with DMEM medium containing**  
307 **0.05% DMSO), triplicate in 3 individual experiments (A). Representative**  
308 **immunoblotting of total HepG2 cell lysates probed with anti-PCNA and anti-β-actin,**

309 used as protein loading control (B). Immunoblotting densitometry analysis. Results  
310 show  $\beta$ -actin normalized proteins expression (n = 3 individual experiments/group)  
311 (C). Values are expressed as mean  $\pm$  SD. Significance levels are indicated by \* $p$  <  
312 0.05 (unpaired t-test) and \*\*\* $p$  < 0.001 (two-way ANOVA followed by Bonferroni's  
313 post hoc test) when compared to the vehicle group. Each protein was analyzed in  
314 cropped membranes of different Western blots along with other proteins. Full-  
315 length blots are presented in S16 Fig.

316

### 317 **AF-Ac reduces HepG2 cell migration**

318 Following these observations, we investigated the influence of AF-Ac on the  
319 migration of HepG2 cells. Thus, a scratch assay was made in the presence or absence of  
320 AF-Ac (Fig 6A). After 48 h, AF-Ac decreased the healing process ( $47.1 \pm 1.5\%$  of  
321 healing) when compared with untreated cells ( $74.2 \pm 3.5\%$  of healing) ( $p$  < 0.001) (Fig  
322 6B). In order to check if the reduced healing observed during stimulation with AF-Ac is  
323 due to alterations on the focal adhesion points, we performed immunoblotting for  
324 vinculin. However, vinculin levels were not affected in HepG2 cells treated with 50  
325  $\mu\text{g/mL}$  AF-Ac (Figs 6C and 6D).

326

327 **Fig 6. Representative image of *in vitro* wound healing assay performed with HepG2**  
328 **cells. Images were selected from a representative well 48 h after stimulation with 50**  
329  **$\mu\text{g/mL}$  AF-Ac or vehicle (control, cells treated with DMEM medium containing**  
330 **0.05% DMSO). Scale bar = 100  $\mu\text{m}$  (A). Average of wound healing closure 48 h after**  
331 **stimulation with AF-Ac (n = 5 wells/group, for each time point). Results represent**  
332 **% of initial wound area (0 h) (B). Representative cropped immunoblotting of total**  
333 **HepG2 cell lysates probed with anti-vinculin and anti- $\beta$ -actin, used as protein**

334 **loading control (C). Immunoblotting densitometry analysis. Results show  $\beta$ -actin**  
335 **normalized proteins expression (n = 3 individual experiments/group) (D). Values are**  
336 **expressed as mean  $\pm$  SD. Significance levels are indicated by  $***p < 0.001$  (unpaired**  
337 **t-test) when compared to the vehicle group. Each protein was analyzed in cropped**  
338 **membranes of different Western blots along with other proteins. Full-length blots**  
339 **are presented in S16 Fig.**

340

### 341 **Ac reduces EGFR in HepG2 cells**

342 EGFR is known to play an important role in the regulation of cell proliferation in  
343 HepG2 cells. As revealed by immunofluorescence assay (Figs 7A and 7B), EGFR levels  
344 were reduced in HepG2 cells treated with 50  $\mu\text{g/mL}$  AF-Ac ( $p < 0.05$ ). This result is in  
345 accordance with data obtained by immunoblotting assay, with HepG2 cells treated with  
346 50  $\mu\text{g/mL}$  AF-Ac presenting decreased expression of EGFR ( $p < 0.01$ ) (Figs 7C and 7D).

347

348 **Fig 7. Representative immunofluorescence images of HepG2 cells treated with 50**  
349  **$\mu\text{g/mL}$  AF-Ac or vehicle (control, cells treated with DMEM medium containing**  
350 **0.05% DMSO) labeled with specific anti-EGFR (green) antibody. Scale bar = 10  $\mu\text{m}$**   
351 **(A). Average number of EGFR-positive regions for the cell types analyzed are**  
352 **shown as EGFR/1000  $\mu\text{m}^2$  on each respective graph (n = 20 cells/group) (B).**  
353 **Representative cropped immunoblotting of total HepG2 cell lysates probed with**  
354 **anti-EGFR and anti- $\beta$ -actin, used as protein loading control (C). Immunoblotting**  
355 **densitometry analysis. Results show  $\beta$ -actin normalized proteins expression (n = 3**  
356 **individual experiments/group) (D). Values are expressed as mean  $\pm$  SD. Significance**  
357 **levels are indicated by  $**p < 0.01$  (unpaired t-test). Each protein was analyzed in**



358 **cropped membranes of different Western blots along with other proteins. Full-**  
359 **length blots are presented in S16 Fig.**

360

### 361 **AF-Ac increases intracellular Ca<sup>2+</sup> in HepG2 cells**

362 HepG2 cells were loaded with fluo4/AM and assayed for Ca<sup>2+</sup> signals during AF-Ac  
363 stimulation. Fig 8A shows that there was an increase in intracellular-free Ca<sup>2+</sup> when  
364 HepG2 cells were exposed to 50 µg/mL AF-Ac. After 60 s intracellular Ca<sup>2+</sup> rose to peak  
365 levels, as shown by the increase in fluorescence (Fig 8B). We also performed experiments  
366 in the absence of extracellular Ca<sup>2+</sup> to explore the relative contribution of intracellular  
367 Ca<sup>2+</sup> pools to the overall response induced by AF-Ac. Thus, 10 mM EGTA was added to  
368 the Ca<sup>2+</sup>-free HEPES buffer, chelating extracellular-free Ca<sup>2+</sup> levels. AF-Ac triggered  
369 Ca<sup>2+</sup> wave in HepG2 cells with a peak at 480 s after AF-Ac exposure (Fig 8C). No  
370 difference was observed between Ca<sup>2+</sup> levels from nucleus and cytosol (Fig 8D).

371

372 **Fig 8. Confocal serial images of HepG2 cells, loaded with fluo-4/AM and stimulated**  
373 **with 50 µg/mL AF-Ac for 30, 60, 240, 360, 480 and 600 s. Dashed yellow regions**  
374 **represent the nuclear region. Images were pseudocolored according to the scale**  
375 **shown at the bottom. Scale bar = 10 µM (A). Representative time course of nuclear**  
376 **and cytosol fluorescence levels of HepG2 cells, in the presence (B) or absent (C) of**  
377 **EGTA, stimulated with AF-Ac. Black arrow indicates initial AF-Ac stimulation and**  
378 **fluorescence level is expressed as % of basal fluorescence. Average nuclear and**  
379 **cytosol fluorescence peaks (n = 20 cells) of each cell group and condition throughout**  
380 **the time-course; fluorescence level is expressed as % of basal fluorescence (D).**  
381 **Values are expressed as mean ± SD. ns = p > 0.05 (unpaired t-test).**

382

## 383 Discussion

384 The search for natural agents capable of controlling tumor growth and presenting  
385 low toxicity on normal healthy cells has gained prominence in the treatment of cancer [3,  
386 4, 33, 34]. Whole plants or herbal extracts/fractions have been used rather than isolated  
387 molecules due to their more affordable access and synergistic interaction between the  
388 compounds that may increase the biological effects [35]. Numerous alkaloids from  
389 medicinal plants and herbs have showed antiproliferative and anticancer effects on a wide  
390 category of cancers both *in vitro* and *in vivo* [4]. Another example is the annonaceous  
391 acetogenins, which have been identified as cancer growth inhibitors and/or apoptotic  
392 agents [9]. In the present study, we showed the anticancer potential of an alkaloid and  
393 acetogenin-rich fraction from *A. crassiflora* fruit peel, named here as AF-Ac, by  
394 evaluating its antiproliferative properties in human liver carcinoma cells (HepG2) *in vitro*.

395 First, we performed an ethanolic extraction of the fruit peel of *A. crassiflora* and  
396 followed this with a liquid-liquid fractionation of the crude extract to obtain an alkaloid  
397 and acetogenin-rich fraction. Our findings indicated that the dichloromethane fraction had  
398 alkaloids and acetogenins, which was confirmed by UHPLC-ESI/MS<sup>n</sup> and TLC analyses  
399 (supplementary material). Interestingly, all the alkaloids found in AF-Ac are aporphine  
400 alkaloids, such as annonaine, isopoline, isoboldine, isocorydine, lirioidenine,  
401 stephalagine, nuciferine, atherospermidine and xylopine. Until now, stephalagine was the  
402 only alkaloid isolated and characterized in *A. crassiflora* fruit peel [11]. The retention  
403 time, exact mass and MS/MS spectra of stephalagine showed in the present study  
404 corroborates the data reported by Justino, Barbosa (10). In addition, acetogenins such as  
405 bullatanocin, bullatacin/squamocin, annomontacin and desacetyluvaricin were identified  
406 for the first time in the fruit peel of *A. crassiflora*.

407           Annonaceous acetogenins, more specifically bis-tetrahydrofuranic (THF)  
408 acetogenins like that found in AF-Ac, have shown cytotoxicity in HepG2 cells through  
409 the induction of cell-cycle arrest and induction of the apoptotic mitochondrial pathway  
410 involving complexation with  $Ca^{2+}$  [36-38]. Previous studies have also reported that  
411 aporphine alkaloids, such as liriodenine, have prominent cytotoxic effects in several  
412 cancer cell lines such as inducing G1 cell cycle arrest and repressing DNA synthesis in  
413 HepG2 cells, and reducing cell growth and inducing apoptosis in human breast cancer  
414 MCF-7 cells through inhibition of Bcl02, cyclin D1 and vascular endothelial growth  
415 factor [6, 39]. Anonaine also showed cytotoxic effects in HepG2 cells and caused DNA  
416 damage associated with increased intracellular nitric oxide and ROS, glutathione  
417 depletion, disruptive mitochondrial transmembrane potential and activation of caspases  
418 3, 7, 8 and 9 [40]. Moreover, anonaine also up-regulated the p53 and Bax expression [40].  
419 Isocorydine decreased the viability of hepatocellular carcinoma (HCC) and HepG2 cells  
420 [41, 42]. Nuciferine is considered as an anti-tumor agent against human neuroblastoma  
421 and mouse colorectal cancer *in vitro* and *in vivo*, through inhibiting the PI3K-AKT  
422 signaling pathways [43]. Furthermore, a study done by Kang, Lee (44) showed that  
423 nuciferine inhibited the growth of breast cancer cells. Xylopine and isoboldine, two other  
424 aporphine alkaloids found in AF-Ac, were cytotoxic to HepG2 cells and were able to  
425 arrest G2/M cycle [45, 46].

426           AF-Ac at the dose of 50  $\mu\text{g}/\text{mL}$  effectively decreased HepG2 cell viability and  
427 reduced cell proliferation. It is worth mentioning that the AF-Ac at 50  $\mu\text{g}/\text{mL}$  was not  
428 cytotoxic for PBMC and fibroblast cells. The objective of using PBMC and fibroblast  
429 cells as controls is to demonstrate that the AF-Ac fraction is not cytotoxic to healthy cells,  
430 since these human non-cancer cells are potentially useful models for cell viability testing  
431 using plant extracts [47-50]. Also, PBMC cells represent the whole metabolic status and

432 an excellent model for assessing the differences or changes associated with  
433 pathophysiological conditions [47, 51]. Additionally, a study conducted by our research  
434 group also showed no cytotoxicity of the AF-Ac fraction in Vero cells [11].

435 Consistent with the results of MTT and proliferation assays, AF-Ac decreased the  
436 expression of PCNA in the HepG2 cells. PCNA is a cell nuclear protein whose expression  
437 is correlated with DNA replication, regulating the transition from G1 phase to S phase,  
438 and is connected with the proliferation of tumor cells [52]. The antiproliferative potential  
439 of some alkaloids and acetogenins has been associated with their capacity to reduce  
440 PCNA expression. A study done by Long and Li (53) showed the reduction of PCNA  
441 expression by an alkaloidal fraction from aerial parts of *Oxytropis ochrocephala* in mice  
442 hepatocellular carcinoma. In addition, the antitumor potential of berberine and matrine  
443 was demonstrated in the inhibition of the expression of PCNA in ovarian cancer and lung  
444 adenocarcinoma cells, respectively [54, 55]. Annomuricin E, an acetogenin isolated from  
445 *A. muricata* leaf, was also able to down-regulate the PCNA expression in HT-29 colon  
446 cancer cells [56].

447 As well as the PCNA, EGFR also plays an important role in the regulation of cell  
448 proliferation [57]. EGFR overexpression might contribute to deregulated cellular  
449 processes, such as uncontrolled proliferation, invasion, DNA synthesis, angiogenesis, cell  
450 motility and inhibition of apoptosis, which makes it a molecular target for tumor therapy  
451 [57]. In the present study, AF-Ac reduced the expression of EGFR in the HepG2 cells, as  
452 showed by Western blot and immunofluorescence assays. Isocorydine, an aporphine  
453 alkaloid found in AF-Ac, has previously shown cytotoxic effects in HepG2 cells and, by  
454 a docking analysis, and has inhibitory activity against EGFR [42]. Dicentrine, another  
455 aporphine alkaloid, has been shown to exert cytotoxic activity towards cancer cells by  
456 binding to EGFR [7, 33]. In addition, acetogenins influences EGFR signaling to induce

457 cell cycle arrest and inhibit cytotoxic cell survival [58]. These findings indicate that  
458 EGFR and PCNA signaling pathways might play a role in mediating the antiproliferative  
459 activity of AF-Ac on HepG2 cells.

460 Studies have demonstrated that alkaloids and acetogenins may inhibit cell  
461 migration and metastasis of cancer cells [59-61]. Here, we showed the capacity of AF-Ac  
462 to decrease cell migration of HepG2 cells without vinculin overexpression. The capacity  
463 of tumor cells to migrate is essential for many physiological processes including tumor  
464 invasion, angiogenesis and metastasis [62]. The filamentous (F)-actin-binding protein  
465 vinculin is required for cell polarization and migration, having a key role on the formation  
466 of focal adhesion points [63]. Thus, cells with reduced expression of vinculin become less  
467 adherent and more motile [64]. Thus, AF-Ac might be acting on other targets involved  
468 with cell migration than vinculin expression.

469 Finally we investigated whether AF-Ac alters intracellular  $Ca^{2+}$  in the HepG2  
470 cells, since nuclear  $Ca^{2+}$  was previously found to negatively regulate cell motility,  
471 invasion and proliferation [22, 65]. Of note, confocal analysis showed that AF-Ac  
472 increased intracellular  $Ca^{2+}$  through a process that involved  $Ca^{2+}$  influx which requires  
473 external calcium, when  $Ca^{2+}$  was present in the external media. In the absence of external  
474  $Ca^{2+}$ , exposure of HepG2 cells to AF-Ac also mobilized intracellular  $Ca^{2+}$ . This suggests  
475 that the alkaloid and acetogenin-rich fraction induces a mobilization of intracellular  $Ca^{2+}$   
476 stores.  $Ca^{2+}$  is a ubiquitous second messenger that regulates a wide range of activities in  
477 cells, such as secretion, contraction, metabolism, gene transcription, apoptosis and  
478 proliferation [66]. Studies have showed that nuclear  $Ca^{2+}$  buffering reduced cell  
479 proliferation in hepatocellular carcinoma cells by stopping cell cycle progression,  
480 modulating the promoter region activity of genes involved in cell proliferation and/or  
481 preventing the upregulation of the tyrosine kinase receptor [20, 24, 67]. In addition,

482 nuclear  $\text{Ca}^{2+}$  buffering may turn cells more rigid and less motile due to the reduction of  
483 membrane fluctuations [22].

484         Although studies have showed that the mentioned aporphine alkaloids reduce  $\text{Ca}^{2+}$   
485 influx [10, 68, 69], AF-Ac induced increases in cytosolic and nuclear  $\text{Ca}^{2+}$  in the HepG2  
486 cells. It is well known that acetogenins induce an increase of cytosolic and mitochondrial  
487  $\text{Ca}^{2+}$  in several cancer cells [38], which might explain the intracellular  $\text{Ca}^{2+}$  increase  
488 observed in the HepG2 treated with AF-Ac. The mechanism underlying the cytotoxicity  
489 and antiproliferative effect of acetogenins is modulated by the chelation of THF moieties  
490 with  $\text{Ca}^{2+}$  to form hydrophobic complexes, which may induce sustained increases in  
491 intracellular and mitochondrial  $\text{Ca}^{2+}$  concentrations, resulting in decrease of  
492 mitochondrial membrane potential that leads to the release of apoptotic initiators [38, 70].  
493 Thus, the chelating ability of acetogenins with  $\text{Ca}^{2+}$  might contribute, at least in part, to  
494 the anti-migration and anti-proliferative capacities of AF-Ac in the HepG2 cells.

495

## 496 **Conclusions**

497         In summary, our results have established the antiproliferative properties of AF-Ac  
498 on HepG2 cells and suggest that this effect is mediated, at least in part, by reducing PCNA  
499 and EGFR expression with a mobilization of intracellular  $\text{Ca}^{2+}$ . Although the biochemical  
500 mechanisms involved in the antiproliferative effect of the alkaloids and acetogenins from  
501 *A. crassiflora* on HepG2 cells were not fully explored, this study is the first to identify  
502 the alkaloids and acetogenins present in the fruit peel of *A. crassiflora* and to demonstrate  
503 its antitumoral potential. Furthermore, the biological activities exercised by the AF-Ac  
504 fraction were observed in concentrations below the cytotoxic level. Thus, the use of this  
505 alkaloid and acetogenin-rich fraction in further *in vivo* assays is justified.

506

## 507 **Acknowledgments**

508           The authors gratefully acknowledge the Institute of Biotechnology of the Federal  
509 University of Uberlândia and the Department of Physiology and Biophysics and the Liver  
510 Center of the Federal University of Minas Gerais for infrastructural support, Mário M.  
511 Martins and Paula Souza Santos for technical assistance in LC-MS analysis, and Luiz  
512 Ricardo Goulart for supervision.

513

## 514 **References**

- 515 1.       Petrick JL, McGlynn KA. The Changing Epidemiology of Primary Liver Cancer.  
516 Current Epidemiology Reports. 2019;6(2):104-11. doi: 10.1007/s40471-019-00188-3.
- 517 2.       Gomaa A-I, Khan S-A, Toledano M-B, Waked I, Taylor-Robinson S-D.  
518 Hepatocellular carcinoma: epidemiology, risk factors and pathogenesis. World journal of  
519 gastroenterology. 2008;14(27):4300-8. doi: 10.3748/wjg.14.4300. PubMed PMID:  
520 18666317.
- 521 3.       de Mesquita ML, de Paula JE, Pessoa C, de Moraes MO, Costa-Lotufo LV,  
522 Grougnet R, et al. Cytotoxic activity of Brazilian Cerrado plants used in traditional  
523 medicine against cancer cell lines. Journal of ethnopharmacology. 2009;123(3):439-45.  
524 Epub 2009/06/09. doi: 10.1016/j.jep.2009.03.018. PubMed PMID: 19501276.
- 525 4.       Mondal A, Gandhi A, Fimognari C, Atanasov AG, Bishayee A. Alkaloids for  
526 cancer prevention and therapy: Current progress and future perspectives. European  
527 journal of pharmacology. 2019;858:172472. doi:  
528 <https://doi.org/10.1016/j.ejphar.2019.172472>.
- 529 5.       Liu Y, Liu J, Di D, Li M, Fen Y. Structural and mechanistic bases of the anticancer  
530 activity of natural aporphinoid alkaloids. Curr Top Med Chem. 2013;13(17):2116-26.  
531 Epub 2013/08/28. doi: 10.2174/15680266113139990147. PubMed PMID: 23978138.

- 532 6. Hsieh TJ, Liu TZ, Chern CL, Tsao DA, Lu FJ, Syu YH, et al. Liriodenine inhibits  
533 the proliferation of human hepatoma cell lines by blocking cell cycle progression and  
534 nitric oxide-mediated activation of p53 expression. *Food and chemical toxicology : an*  
535 *international journal published for the British Industrial Biological Research Association.*  
536 2005;43(7):1117-26. Epub 2005/04/19. doi: 10.1016/j.fct.2005.03.002. PubMed PMID:  
537 15833387.
- 538 7. Kondo Y, Imai Y, Hojo H, Endo T, Nozoe S. Suppression of tumor cell growth  
539 and mitogen response by aporphine alkaloids, dicentrine, glaucine, corydine, and  
540 apomorphine. *J Pharmacobiodyn.* 1990;13(7):426-31. Epub 1990/07/01. doi:  
541 10.1248/bpb1978.13.426. PubMed PMID: 2290126.
- 542 8. Liu CM, Kao CL, Wu HM, Li WJ, Huang CT, Li HT, et al. Antioxidant and  
543 anticancer aporphine alkaloids from the leaves of *Nelumbo nucifera* Gaertn. cv. *Rosa-*  
544 *plena.* *Molecules.* 2014;19(11):17829-38. Epub 2014/11/06. doi:  
545 10.3390/molecules191117829. PubMed PMID: 25372397; PubMed Central PMCID:  
546 PMC6271390.
- 547 9. Jacobo-Herrera N, Pérez-Plasencia C, Castro-Torres VA, Martínez-Vázquez M,  
548 González-Esquinca AR, Zentella-Dehesa A. Selective Acetogenins and Their Potential  
549 as Anticancer Agents. *Frontiers in Pharmacology.* 2019;10(783). doi:  
550 10.3389/fphar.2019.00783.
- 551 10. Justino AB, Barbosa MF, Neves TV, Silva HCG, Brum EdS, Fialho MFP, et al.  
552 Stephalagine, an aporphine alkaloid from *Annona crassiflora* fruit peel, induces  
553 antinociceptive effects by TRPA1 and TRPV1 channels modulation in mice. *Bioorganic*  
554 *Chemistry.* 2020;96:103562. doi: <https://doi.org/10.1016/j.bioorg.2019.103562>.
- 555 11. Pereira MN, Justino AB, Martins MM, Peixoto LG, Vilela DD, Santos PS, et al.  
556 Stephalagine, an alkaloid with pancreatic lipase inhibitory activity isolated from the fruit



- 557 peel of *Annona crassiflora* Mart. *Industrial Crops and Products*. 2017;97:324-9. doi:  
558 <http://dx.doi.org/10.1016/j.indcrop.2016.12.038>.
- 559 12. Pimenta LP, Garcia GM, Goncalves SG, Dionisio BL, Braga EM, Mosqueira VC.  
560 In vivo antimalarial efficacy of acetogenins, alkaloids and flavonoids enriched fractions  
561 from *Annona crassiflora* Mart. *Natural product research*. 2014;28(16):1254-9. Epub  
562 2014/04/01. doi: 10.1080/14786419.2014.900496. PubMed PMID: 24678811.
- 563 13. Vilar JB, Ferreira FL, Ferri PH, Guillo LA, Chen Chen L. Assessment of the  
564 mutagenic, antimutagenic and cytotoxic activities of ethanolic extract of araticum  
565 (*Annona crassiflora* Mart. 1841) by micronucleus test in mice. *Braz J Biol*.  
566 2008;68(1):141-7. PubMed PMID: 18470389.
- 567 14. Silva JJ, Cerdeira CD, Chavasco JM, Cintra AB, Silva CB, Mendonca AN, et al.  
568 In vitro screening antibacterial activity of *Bidens pilosa* Linne and *Annona crassiflora*  
569 Mart. against oxacillin resistant *Staphylococcus aureus* (ORSA) from the aerial  
570 environment at the dental clinic. *Rev Inst Med Trop Sao Paulo*. 2014;56(4):333-40.  
571 PubMed PMID: 25076435; PubMed Central PMCID: PMC4131820.
- 572 15. Graham JG, Quinn ML, Fabricant DS, Farnsworth NR. Plants used against cancer  
573 - an extension of the work of Jonathan Hartwell. *Journal of ethnopharmacology*.  
574 2000;73(3):347-77. Epub 2000/11/25. doi: 10.1016/s0378-8741(00)00341-x. PubMed  
575 PMID: 11090989.
- 576 16. Formagio AS, Vieira MC, Volobuff CR, Silva MS, Matos AI, Cardoso CA, et al.  
577 In vitro biological screening of the anticholinesterase and antiproliferative activities of  
578 medicinal plants belonging to Annonaceae. *Braz J Med Biol Res*. 2015;48(4):308-15. doi:  
579 10.1590/1414-431X20144127. PubMed PMID: 25714885; PubMed Central PMCID:  
580 PMC4418360.

- 581 17. Silva VAO, Alves ALV, Rosa MN, Silva LRV, Melendez ME, Cury FP, et al.  
582 Hexane partition from *Annona crassiflora* Mart. promotes cytotoxicity and apoptosis on  
583 human cervical cancer cell lines. *Investigational new drugs*. 2019;37(4):602-15. doi:  
584 10.1007/s10637-018-0657-y.
- 585 18. Justino AB, Miranda NC, Franco RR, Martins MM, Silva NMD, Espindola FS.  
586 *Annona muricata* Linn. leaf as a source of antioxidant compounds with in vitro  
587 antidiabetic and inhibitory potential against alpha-amylase, alpha-glucosidase, lipase,  
588 non-enzymatic glycation and lipid peroxidation. *Biomedicine & pharmacotherapy* =  
589 *Biomedecine & pharmacotherapie*. 2018;100:83-92. Epub 2018/02/10. doi:  
590 10.1016/j.biopha.2018.01.172. PubMed PMID: 29425747.
- 591 19. Bradford MM. A rapid and sensitive method for the quantitation of microgram  
592 quantities of protein utilizing the principle of protein-dye binding. *Anal Biochem*.  
593 1976;72:248-54. PubMed PMID: 942051.
- 594 20. Rodrigues MA, Gomes DA, Leite MF, Grant W, Zhang L, Lam W, et al.  
595 Nucleoplasmic calcium is required for cell proliferation. *The Journal of biological*  
596 *chemistry*. 2007;282(23):17061-8. Epub 04/09. doi: 10.1074/jbc.M700490200. PubMed  
597 PMID: 17420246.
- 598 21. Liang CC, Park AY, Guan JL. In vitro scratch assay: a convenient and inexpensive  
599 method for analysis of cell migration in vitro. *Nat Protoc*. 2007;2(2):329-33. Epub  
600 2007/04/05. doi: 10.1038/nprot.2007.30. PubMed PMID: 17406593.
- 601 22. Guimaraes E, Machado R, Fonseca MC, Franca A, Carvalho C, Araujo ESAC, et  
602 al. Inositol 1, 4, 5-trisphosphate-dependent nuclear calcium signals regulate angiogenesis  
603 and cell motility in triple negative breast cancer. *PLoS One*. 2017;12(4):e0175041. Epub  
604 2017/04/05. doi: 10.1371/journal.pone.0175041. PubMed PMID: 28376104; PubMed  
605 Central PMCID: PMC5380351.

- 606 23. Alvarenga EC, Fonseca MC, Carvalho CC, Florentino RM, França A, Matias E,  
607 et al. Angiotensin Converting Enzyme Regulates Cell Proliferation and Migration. *PLoS*  
608 *One*. 2016;11(12):e0165371. Epub 2016/12/20. doi: 10.1371/journal.pone.0165371.  
609 PubMed PMID: 27992423; PubMed Central PMCID: PMC5167550.
- 610 24. Amaya MJ, Oliveira AG, Guimaraes ES, Casteluber MC, Carvalho SM, Andrade  
611 LM, et al. The insulin receptor translocates to the nucleus to regulate cell proliferation in  
612 liver. *Hepatology*. 2014;59(1):274-83. Epub 2013/07/11. doi: 10.1002/hep.26609.  
613 PubMed PMID: 23839970; PubMed Central PMCID: PMC3823683.
- 614 25. Fonseca MdC, França A, Florentino RM, Fonseca RC, Lima Filho ACM, Vidigal  
615 PTV, et al. Cholesterol-enriched membrane microdomains are needed for insulin  
616 signaling and proliferation in hepatic cells. *American Journal of Physiology-*  
617 *Gastrointestinal and Liver Physiology*. 2018;315(1):G80-G94. doi:  
618 10.1152/ajpgi.00008.2018.
- 619 26. de Lima BR, da Silva FM, Soares ER, de Almeida RA, da Silva-Filho FA, Barison  
620 A, et al. Integrative Approach Based on Leaf Spray Mass Spectrometry,  
621 HPLC-DAD-MS/MS, and NMR for Comprehensive Characterization of  
622 Isoquinoline-Derived Alkaloids in Leaves of *Onychopetalum amazonicum* RE Fr. *J Braz*  
623 *Chem Soc*. 2019:1-11.
- 624 27. Costa EV, Sampaio MFC, Salvador MJ, Nepel A, Barison A. Chemical  
625 constituents from the stem bark of *Annona pickelii* (Annonaceae). *Química Nova*.  
626 2015;38(6):769-76.
- 627 28. Santos MdFC, Fontes JEN, Dutra LM, Bomfim LM, Costa CO, Moraes VR, et al.  
628 Alkaloids from leaves of *Guatteria pogonopus* (Annonaceae) and their cytotoxicities.  
629 *Química Nova*. 2018;41(8):884-90.

- 630 29. Silva F, Koolen HHF, Almeida R, Souza A, Pinheiro M, Costa E. Desrepliação  
631 de alcaloides aporfínicos e oxoaporfínicos de *Unonopsis guatterioides* por ESI-IT-MS.  
632 *Quím nova*. 2012;35(5):S1-S5.
- 633 30. Galarce-Bustos O, Pavon J, Henriquez-Aedo K, Aranda M. Detection and  
634 identification of acetylcholinesterase inhibitors in *Annona cherimola* Mill. by effect-  
635 directed analysis using thin-layer chromatography-bioassay-mass spectrometry.  
636 2019;30(6):679-86. doi: 10.1002/pca.2843. PubMed PMID: 31183917.
- 637 31. Aldulaimi AKO, Azziz S, Bakri YM, Nafiah MA, Awang K, Aowda S, et al.  
638 Alkaloids from *Alphonsea Elliptica* Barks and their biological activities. *J Global Pharma*  
639 *Technol*. 2018;10(08):270-5.
- 640 32. Avula B, Bae JY, Majrashi T, Wu TY, Wang YH, Wang M, et al. Targeted and  
641 non-targeted analysis of annonaceous alkaloids and acetogenins from *Asimina* and  
642 *Annona* species using UHPLC-QToF-MS. *Journal of pharmaceutical and biomedical*  
643 *analysis*. 2018;159:548-66. Epub 2018/08/06. doi: 10.1016/j.jpba.2018.07.030. PubMed  
644 PMID: 30077947.
- 645 33. Konkimalla VB, Efferth T. Inhibition of epidermal growth factor receptor over-  
646 expressing cancer cells by the aporphine-type isoquinoline alkaloid, dicentrine.  
647 *Biochemical pharmacology*. 2010;79(8):1092-9. doi:  
648 <https://doi.org/10.1016/j.bcp.2009.11.025>.
- 649 34. Newman DJ, Cragg GM. Natural Products as Sources of New Drugs from 1981  
650 to 2014. *Journal of natural products*. 2016;79(3):629-61. Epub 2016/02/09. doi:  
651 10.1021/acs.jnatprod.5b01055. PubMed PMID: 26852623.
- 652 35. Wagner H, Ulrich-Merzenich G. Synergy research: approaching a new generation  
653 of phytopharmaceuticals. *Phytomedicine : international journal of phytotherapy and*

- 654 phytopharmacology. 2009;16(2-3):97-110. Epub 2009/02/13. doi:  
655 10.1016/j.phymed.2008.12.018. PubMed PMID: 19211237.
- 656 36. de Pedro N, Cautain B, Melguizo A, Vicente F, Genilloud O, Pelaez F, et al.  
657 Mitochondrial complex I inhibitors, acetogenins, induce HepG2 cell death through the  
658 induction of the complete apoptotic mitochondrial pathway. Journal of bioenergetics and  
659 biomembranes. 2013;45(1-2):153-64. Epub 2012/11/28. doi: 10.1007/s10863-012-9489-  
660 1. PubMed PMID: 23180140.
- 661 37. Chen Y, Chen JW, Zhai JH, Wang Y, Wang SL, Li X. Antitumor activity and  
662 toxicity relationship of annonaceous acetogenins. Food and chemical toxicology : an  
663 international journal published for the British Industrial Biological Research Association.  
664 2013;58:394-400. Epub 2013/05/29. doi: 10.1016/j.fct.2013.05.028. PubMed PMID:  
665 23712095.
- 666 38. Juang SH, Chiang CY, Liang FP, Chan HH, Yang JS, Wang SH, et al. Mechanistic  
667 Study of Tetrahydrofuran- acetogenins In Triggering Endoplasmic Reticulum Stress  
668 Response-apoptosis in Human Nasopharyngeal Carcinoma. Scientific reports.  
669 2016;6:39251. Epub 2016/12/22. doi: 10.1038/srep39251. PubMed PMID: 28000792;  
670 PubMed Central PMCID: PMC5175284.
- 671 39. Li ZH, Gao J, Hu PH, Xiong JP. Anticancer effects of liriodenine on the cell  
672 growth and apoptosis of human breast cancer MCF-7 cells through the upregulation of  
673 p53 expression. Oncol Lett. 2017;14(2):1979-84. Epub 2017/08/07. doi:  
674 10.3892/ol.2017.6418. PubMed PMID: 28781641; PubMed Central PMCID:  
675 PMC5530144.
- 676 40. Li H-T, Wu H-M, Chen H-L, Liu C-M, Chen C-Y. The pharmacological activities  
677 of (-)-anonaine. Molecules. 2013;18(7):8257-63. doi: 10.3390/molecules18078257.  
678 PubMed PMID: 23857128.

- 679 41. Lu P, Sun H, Zhang L, Hou H, Zhang L, Zhao F, et al. Isocorydine targets the  
680 drug-resistant cellular side population through PDCD4-related apoptosis in  
681 hepatocellular carcinoma. *Molecular medicine (Cambridge, Mass)*. 2012;18(1):1136-46.  
682 doi: 10.2119/molmed.2012.00055. PubMed PMID: 22714713.
- 683 42. Yan Q, Li RX, Xin AY, Liu JX, Li WG, Di DL. [Research on anticancer activity  
684 of isocorydine and its derivatives]. *Zhongguo Zhong Yao Za Zhi*. 2017;42(16):3152-8.  
685 Epub 2017/11/25. doi: 10.19540/j.cnki.cjcm.20170512.008. PubMed PMID:  
686 29171235.
- 687 43. Qi Q, Li R, Li H-Y, Cao Y-B, Bai M, Fan X-J, et al. Identification of the anti-  
688 tumor activity and mechanisms of nuciferine through a network pharmacology approach.  
689 *Acta pharmacologica Sinica*. 2016;37(7):963-72. Epub 05/16. doi: 10.1038/aps.2016.53.  
690 PubMed PMID: 27180984.
- 691 44. Kang EJ, Lee SK, Park KK, Son SH, Kim KR, Chung WY. Liensinine and  
692 Nuciferine, Bioactive Components of *Nelumbo nucifera*, Inhibit the Growth of Breast  
693 Cancer Cells and Breast Cancer-Associated Bone Loss. 2017;2017:1583185. doi:  
694 10.1155/2017/1583185. PubMed PMID: 29333179.
- 695 45. Menezes LRA, Costa CODS, Rodrigues ACBdC, Santo FRdE, Nepel A, Dutra  
696 LM, et al. Cytotoxic Alkaloids from the Stem of *Xylopia laevigata*. *Molecules*.  
697 2016;21(7):890. doi: 10.3390/molecules21070890. PubMed PMID: 27399666.
- 698 46. Rodríguez-Arce E, Cancino P, Arias-Calderón M, Silva-Matus P, Saldías M.  
699 Oxoisoaporphines and Aporphines: Versatile Molecules with Anticancer Effects.  
700 *Molecules*. 2019;25(1):108. doi: 10.3390/molecules25010108. PubMed PMID:  
701 31892146.
- 702 47. Liew CC, Ma J, Tang HC, Zheng R, Dempsey AA. The peripheral blood  
703 transcriptome dynamically reflects system wide biology: a potential diagnostic tool. *The*

- 704 Journal of laboratory and clinical medicine. 2006;147(3):126-32. Epub 2006/03/01. doi:  
705 10.1016/j.lab.2005.10.005. PubMed PMID: 16503242.
- 706 48. Jantová S, Topol'ská D, Janošková M, Pánik M, Milata V. Study of the  
707 cytotoxic/toxic potential of the novel anticancer selenodiazoloquinolone on fibroblast  
708 cells and 3D skin model. *Interdiscip Toxicol.* 2016;9(3-4):106-12. Epub 05/17. doi:  
709 10.1515/intox-2016-0014. PubMed PMID: 28652854.
- 710 49. Senousy HH, Abd Ellatif S, Ali S. Assessment of the antioxidant and anticancer  
711 potential of different isolated strains of cyanobacteria and microalgae from soil and  
712 agriculture drain water. *Environmental Science and Pollution Research.*  
713 2020;27(15):18463-74. doi: 10.1007/s11356-020-08332-z.
- 714 50. El-Garawani IM, El-Sabbagh SM, Abbas NH, Ahmed HS, Eissa OA, Abo-Atya  
715 DM, et al. A newly isolated strain of *Halomonas* sp. (HA1) exerts anticancer potential via  
716 induction of apoptosis and G2/M arrest in hepatocellular carcinoma (HepG2) cell line.  
717 *Scientific reports.* 2020;10(1):14076. doi: 10.1038/s41598-020-70945-8.
- 718 51. Burczynski ME, Dorner AJ. Transcriptional profiling of peripheral blood cells in  
719 clinical pharmacogenomic studies. *Pharmacogenomics.* 2006;7(2):187-202. Epub  
720 2006/03/07. doi: 10.2217/14622416.7.2.187. PubMed PMID: 16515398.
- 721 52. Strzalka W, Ziemienowicz A. Proliferating cell nuclear antigen (PCNA): a key  
722 factor in DNA replication and cell cycle regulation. *Annals of botany.* 2011;107(7):1127-  
723 40. Epub 12/17. doi: 10.1093/aob/mcq243. PubMed PMID: 21169293.
- 724 53. Long L, Li Q. The effect of alkaloid from *Oxytropis ochrocephala* on growth  
725 inhibition and expression of PCNA and p53 in mice bearing H22 Hepatocellular  
726 Carcinoma. *Yakugaku Zasshi.* 2005;125(8):665-70. Epub 2005/08/05. doi:  
727 10.1248/yakushi.125.665. PubMed PMID: 16079618.

- 728 54. Liu L, Fan J, Ai G, Liu J, Luo N, Li C, et al. Berberine in combination with  
729 cisplatin induces necroptosis and apoptosis in ovarian cancer cells. *Biol Res.*  
730 2019;52(1):37. Epub 2019/07/20. doi: 10.1186/s40659-019-0243-6. PubMed PMID:  
731 31319879; PubMed Central PMCID: PMCPmc6637630.
- 732 55. Lu Z, Xiao Y, Liu X, Zhang Z, Xiao F, Bi Y. Matrine reduces the proliferation of  
733 A549 cells via the p53/p21/PCNA/eIF4E signaling pathway. *Molecular medicine reports.*  
734 2017;15(5):2415-22. Epub 2017/04/28. doi: 10.3892/mmr.2017.6331. PubMed PMID:  
735 28447756; PubMed Central PMCID: PMCPmc5428535.
- 736 56. Zorofchian Moghadamtousi S, Rouhollahi E, Karimian H, Fadaeinasab M,  
737 Firoozinia M, Ameen Abdulla M, et al. The chemopotential effect of *Annona muricata*  
738 leaves against azoxymethane-induced colonic aberrant crypt foci in rats and the apoptotic  
739 effect of Acetogenin Annomuricin E in HT-29 cells: a bioassay-guided approach. *PLoS*  
740 *One.* 2015;10(4):e0122288-e. doi: 10.1371/journal.pone.0122288. PubMed PMID:  
741 25860620.
- 742 57. Sigismund S, Avanzato D, Lanzetti L. Emerging functions of the EGFR in cancer.  
743 *Molecular oncology.* 2018;12(1):3-20. Epub 11/27. doi: 10.1002/1878-0261.12155.  
744 PubMed PMID: 29124875.
- 745 58. Qazi AK, Siddiqui JA, Jahan R, Chaudhary S, Walker LA, Sayed Z, et al.  
746 Emerging therapeutic potential of graviola and its constituents in cancers. *Carcinogenesis.*  
747 2018;39(4):522-33. Epub 2018/02/21. doi: 10.1093/carcin/bgy024. PubMed PMID:  
748 29462271; PubMed Central PMCID: PMCPmc5888937.
- 749 59. Liu J, He Y, Zhang D, Cai Y, Zhang C, Zhang P, et al. In vitro anticancer effects  
750 of two novel phenanthroindolizidine alkaloid compounds on human colon and liver  
751 cancer cells. *Molecular medicine reports.* 2017;16(3):2595-603. Epub 06/29. doi:  
752 10.3892/mmr.2017.6879. PubMed PMID: 28677760.



- 753 60. Wang X, Decker CC, Zechner L, Krstin S, Wink M. In vitro wound healing of  
754 tumor cells: inhibition of cell migration by selected cytotoxic alkaloids. *BMC*  
755 *Pharmacology and Toxicology*. 2019;20(1):4. doi: 10.1186/s40360-018-0284-4.
- 756 61. Yiallouris A, Patrikios I, Johnson EO, Sereti E, Dimas K, De Ford C, et al.  
757 Annonacin promotes selective cancer cell death via NKA-dependent and SERCA-  
758 dependent pathways. *Cell Death Dis*. 2018;9(7):764-. doi: 10.1038/s41419-018-0772-x.  
759 PubMed PMID: 29988040.
- 760 62. Small JV, Geiger B, Kaverina I, Bershadsky A. How do microtubules guide  
761 migrating cells? *Nature Reviews Molecular Cell Biology*. 2002;3(12):957-64. doi:  
762 10.1038/nrm971.
- 763 63. Thievensen I, Fakhri N, Steinwachs J, Kraus V, McIsaac RS, Gao L, et al. Vinculin  
764 is required for cell polarization, migration, and extracellular matrix remodeling in 3D  
765 collagen. *Faseb j*. 2015;29(11):4555-67. Epub 2015/07/22. doi: 10.1096/fj.14-268235.  
766 PubMed PMID: 26195589; PubMed Central PMCID: PMC4608908.
- 767 64. Xu W, Coll JL, Adamson ED. Rescue of the mutant phenotype by reexpression of  
768 full-length vinculin in null F9 cells; effects on cell locomotion by domain deleted  
769 vinculin. *J Cell Sci*. 1998;111 ( Pt 11):1535-44. Epub 1998/05/15. PubMed PMID:  
770 9580561.
- 771 65. Resende RR, Andrade LM, Oliveira AG, Guimarães ES, Guatimosim S, Leite MF.  
772 Nucleoplasmic calcium signaling and cell proliferation: calcium signaling in the nucleus.  
773 *Cell Commun Signal*. 2013;11(1):14-. doi: 10.1186/1478-811X-11-14. PubMed PMID:  
774 23433362.
- 775 66. Berridge MJ, Lipp P, Bootman MD. The versatility and universality of calcium  
776 signalling. *Nat Rev Mol Cell Biol*. 2000;1(1):11-21. Epub 2001/06/20. doi:  
777 10.1038/35036035. PubMed PMID: 11413485.

- 778 67. Andrade V, Guerra M, Jardim C, Melo F, Silva W, Ortega JM, et al.  
779 Nucleoplasmic calcium regulates cell proliferation through legumain. *J Hepatol.*  
780 2011;55(3):626-35. Epub 2011/01/18. doi: 10.1016/j.jhep.2010.12.022. PubMed PMID:  
781 21237226; PubMed Central PMCID: PMC3158841.
- 782 68. Sotnikova R, Kettmann V, Kostalova D, Taborska E. Relaxant properties of some  
783 aporphine alkaloids from *Mahonia aquifolium*. *Methods and findings in experimental and*  
784 *clinical pharmacology.* 1997;19(9):589-97. Epub 1998/03/21. PubMed PMID: 9500122.
- 785 69. Ivorra MD, Martinez F, Serrano A, D'Ocon P. Different mechanism of relaxation  
786 induced by aporphine alkaloids in rat uterus. *The Journal of pharmacy and pharmacology.*  
787 1993;45(5):439-43. Epub 1993/05/01. doi: 10.1111/j.2042-7158.1993.tb05572.x.  
788 PubMed PMID: 8099963.
- 789 70. Liaw CC, Liao WY, Chen CS, Jao SC, Wu YC, Shen CN, et al. The calcium-  
790 chelating capability of tetrahydrofuranic moieties modulates the cytotoxicity of  
791 annonaceous acetogenins. *Angewandte Chemie (International ed in English).*  
792 2011;50(34):7885-91. Epub 2011/07/12. doi: 10.1002/anie.201100717. PubMed PMID:  
793 21744442.

794

## 795 **Supporting information**

796 **S1 Fig. Analytical TLC (SiO<sub>2</sub>) of the alkaloid and acetogenin-rich fraction from**  
797 ***Annona crassiflora* fruit peel (AF-Ac) developed with CH<sub>2</sub>Cl<sub>2</sub>-MeOH-NH<sub>4</sub>OH**  
798 **(9:1:0.25) and revealed with ICIPt reagent.**

799

800 **S2 Fig. HPLC-ESI-MS/MS of isopiline from the alkaloid and acetogenin-rich**  
801 **fraction from *Annona crassiflora* fruit peel (AF-Ac) (*m/z* 298 [M+H]<sup>+</sup>).**

802

803 **S3 Fig. HPLC-ESI-MS/MS of isoboldine from the alkaloid and acetogenin-rich**  
804 **fraction from *Annona crassiflora* fruit peel (AF-Ac) ( $m/z$  328 [M+H]<sup>+</sup>).**

805

806 **S4 Fig. HPLC-ESI-MS/MS of isocorydine from the alkaloid and acetogenin-rich**  
807 **fraction from *Annona crassiflora* fruit peel (AF-Ac) ( $m/z$  342 [M+H]<sup>+</sup>).**

808

809 **S5 Fig. HPLC-ESI-MS/MS of anonaine from the alkaloid and acetogenin-rich**  
810 **fraction from *Annona crassiflora* fruit peel (AF-Ac) ( $m/z$  266 [M+H]<sup>+</sup>).**

811

812 **S6 Fig. HPLC-ESI-MS/MS of xylopine from the alkaloid and acetogenin-rich**  
813 **fraction from *Annona crassiflora* fruit peel (AF-Ac) ( $m/z$  296 [M+H]<sup>+</sup>).**

814

815 **S7 Fig. HPLC-ESI-MS/MS of stephalagine from the alkaloid and acetogenin-rich**  
816 **fraction from *Annona crassiflora* fruit peel (AF-Ac) ( $m/z$  310 [M+H]<sup>+</sup>).**

817

818 **S8 Fig. HPLC-ESI-MS/MS of nuciferine from the alkaloid and acetogenin-rich**  
819 **fraction from *Annona crassiflora* fruit peel (AF-Ac) ( $m/z$  296 [M+H]<sup>+</sup>).**

820

821 **S9 Fig. HPLC-ESI-MS/MS of liriodenine from the alkaloid and acetogenin-rich**  
822 **fraction from *Annona crassiflora* fruit peel (AF-Ac) ( $m/z$  276 [M+H]<sup>+</sup>).**

823

824 **S10 Fig. HPLC-ESI-MS/MS of atherospermidine from the alkaloid and acetogenin-**  
825 **rich fraction from *Annona crassiflora* fruit peel (AF-Ac) ( $m/z$  306 [M+H]<sup>+</sup>).**

826

827 **S11 Fig. HPLC-ESI-MS/MS of bullatanocin from the alkaloid and acetogenin-rich**  
828 **fraction from *Annona crassiflora* fruit peel (AF-Ac) ( $m/z$  661 [M+Na]<sup>+</sup>).**

829

830 **S12 Fig. HPLC-ESI-MS/MS of bullatacin/squamocin from the alkaloid and**  
831 **acetogenin-rich fraction from *Annona crassiflora* fruit peel (AF-Ac) ( $m/z$  645**  
832 **[M+Na]<sup>+</sup>).**

833

834 **S13 Fig. HPLC-ESI-MS/MS of anomontacin from the alkaloid and acetogenin-rich**  
835 **fraction from *Annona crassiflora* fruit peel (AF-Ac) ( $m/z$  647 [M+Na]<sup>+</sup>).**

836

837 **S14 Fig. HPLC-ESI-MS/MS of desacetyluvaricin/isodesacetyluvaricin from the**  
838 **alkaloid and acetogenin-rich fraction from *Annona crassiflora* fruit peel (AF-Ac)**  
839 **( $m/z$  629 [M+Na]<sup>+</sup>).**

840

841 **S15 Fig. Cell viability of fibroblasts cells treated with the alkaloid and acetogenin-**  
842 **rich fractions of *Annona crassiflora* fruit peel (AF-Ac) or vehicle (control, cells**  
843 **treated with RPMI-1640 medium containing 0.05% DMSO). Results (mean  $\pm$  SD, n**  
844 **= 3) expressed as the percentage of viable cells compared to the vehicle group.**  
845 **Significance levels are indicated by \* $p$  < 0.05 and \*\*\* $p$  < 0.001 when compared to**  
846 **control (one-way ANOVA and Dunnett as posttest).**

847 **The fibroblast cells (NIH/3T3) were grown in RPMI-1640 medium supplemented**  
848 **with fetal bovine serum 10% (FBS), 2 mM glutamine, 100 U/mL penicillin and 100**  
849 **mg/mL streptomycin, at 37 °C and CO<sub>2</sub> 5%. 3 x 10<sup>4</sup> cells were plated in 96-well**  
850 **plates and treated with different concentrations of the AF-Ac fraction or vehicle and**  
851 **incubated for 24 h at 37 °C and 5% CO<sub>2</sub>. Then, 100  $\mu$ L of 5 mg/mL (3-(4,5-**

852 dimethylthiazolyl-2)-2,5-diphenyltetrazolium bromide) solution was incubated with  
853 the supernatant at 37 °C for 2 h in 5% CO<sub>2</sub>. Next, dimethyl sulfoxide (DMSO) was  
854 added and the cell viability was analyzed by absorbance of the purple formazan  
855 from viable cells at 570 nm (Molecular Devices, Menlo Park, CA, USA).

856

857 **S16 Fig. Western blot gels: six samples of each treatment group were evenly**  
858 **distributed in two gels resulting in 3 samples/gel/group. It was necessary to crop the**  
859 **membranes in order to incubate them with different antibodies since different**  
860 **proteins were analyzed in each western blot. Vinculin (124 kDa MW), β-actin (42**  
861 **kDa MW) and PCNA (36 kDa MW) were analyzed in the same western blot by**  
862 **cutting the membrane in three (A). The top part was used to blot vinculin antibodies,**  
863 **the middle part was used to blot β-actin antibodies and the bottom part for PCNA**  
864 **antibodies. EGFR (180 kDa MW) and β-actin (42 kDa MW) were analyzed in the**  
865 **same western blot by cutting the membrane in two (B). The top part was used to blot**  
866 **EGFR antibodies and the bottom part for β-actin antibodies. The original blots show**  
867 **results of vinculin, β-actin, PCNA and EGFR expression of HepG2 cells treated with**  
868 **vehicle (control, showed in the three first lanes, included in the present study), crude**  
869 **ethanol extract from *A. crassiflora* fruit peel (EtOH, not included in the present**  
870 **study), n-butanol fraction from *A. crassiflora* fruit peel (BuOH, not included in the**  
871 **present study) and alkaloid and acetogenin-rich fraction from *A. crassiflora* fruit**  
872 **peel (AF-Ac, showed in the last three lanes, included in the present study). The**  
873 **corresponding MW (KD) markers are shown to the left of the Western blot image.**

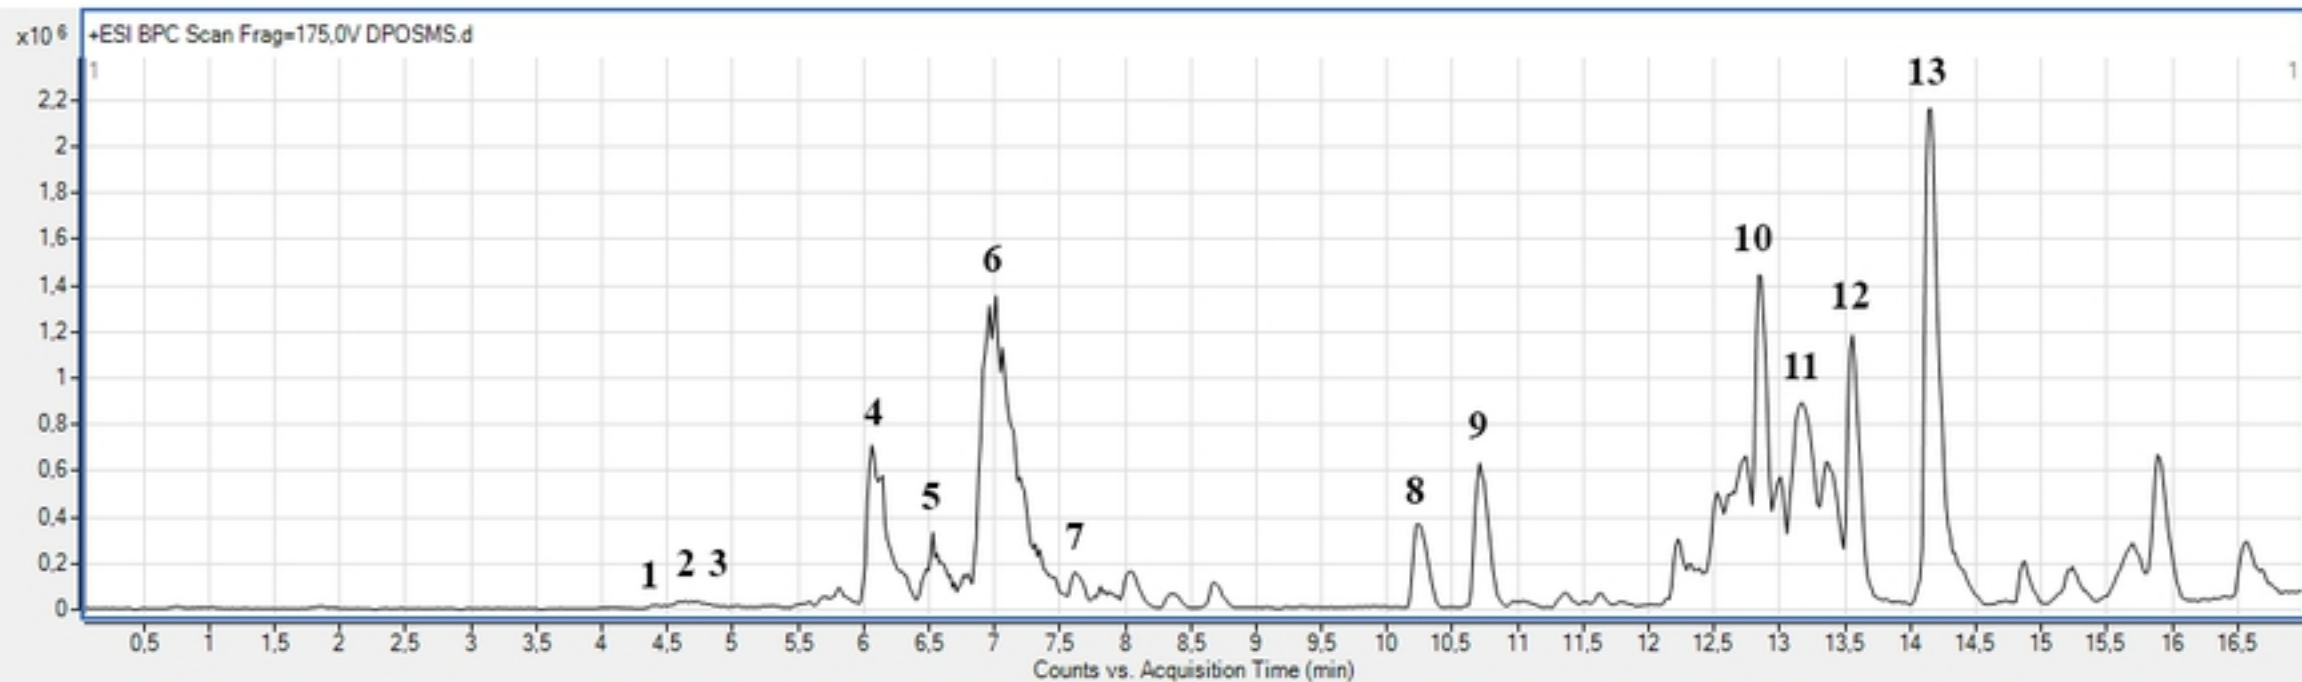

Figure 1

bioRxiv preprint doi: <https://doi.org/10.1101/2021.04.07.438799>; this version posted April 7, 2021. The copyright holder for this preprint (which was not certified by peer review) is the author/funder, who has granted bioRxiv a license to display the preprint in perpetuity. It is made available under aCC-BY 4.0 International license.

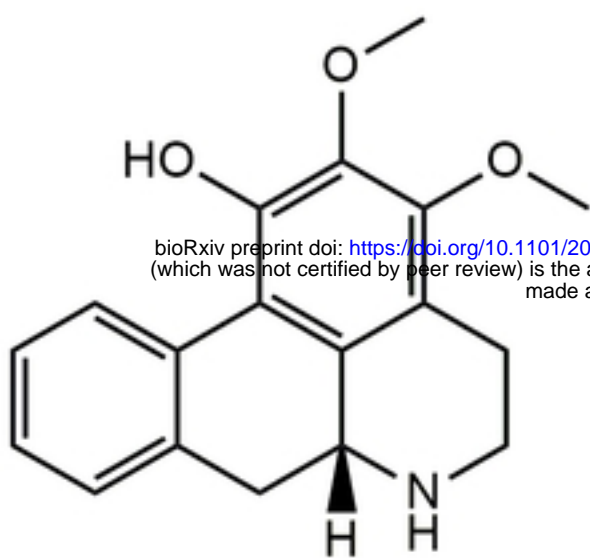

Isopiline

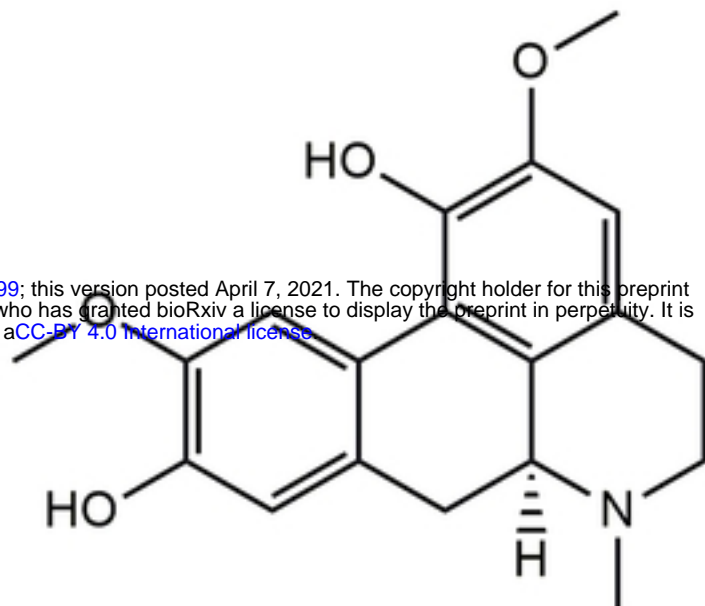

Isoboldine

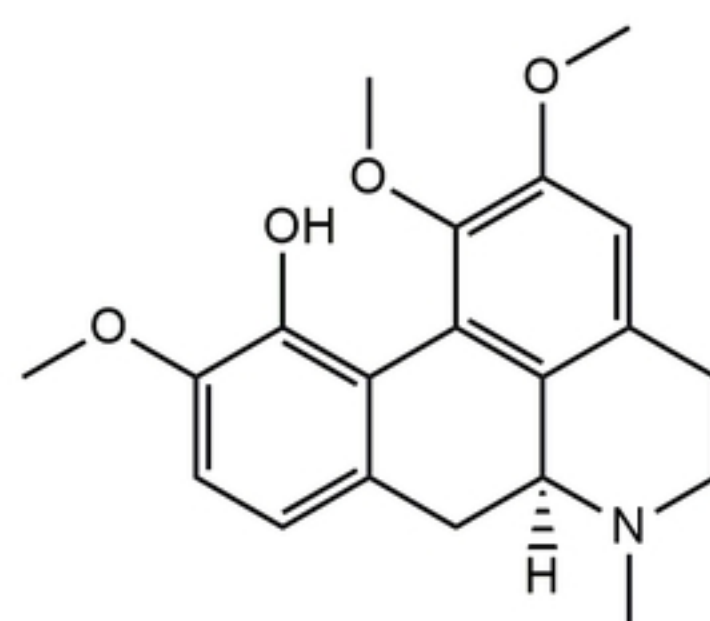

Isocorydine

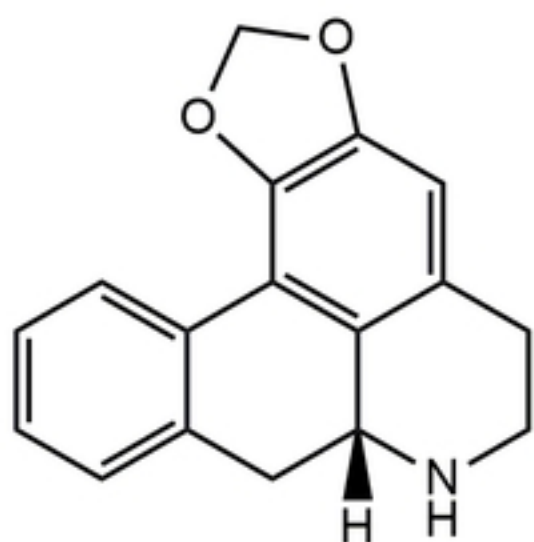

Anonaine

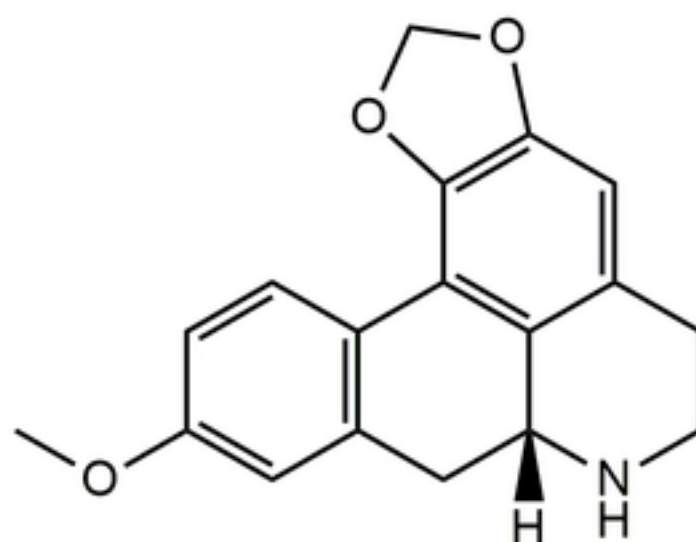

Xylopine

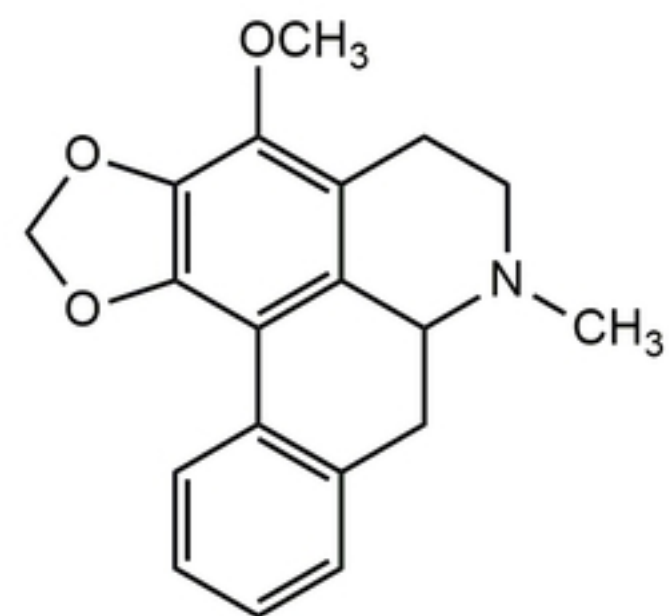

Stephalagine

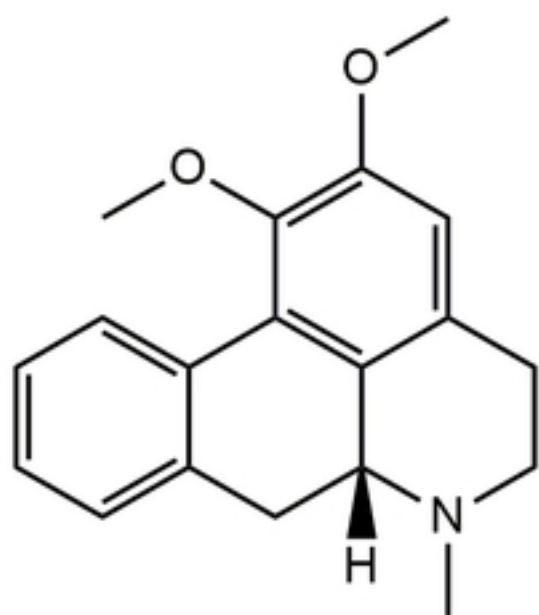

Nuciferine

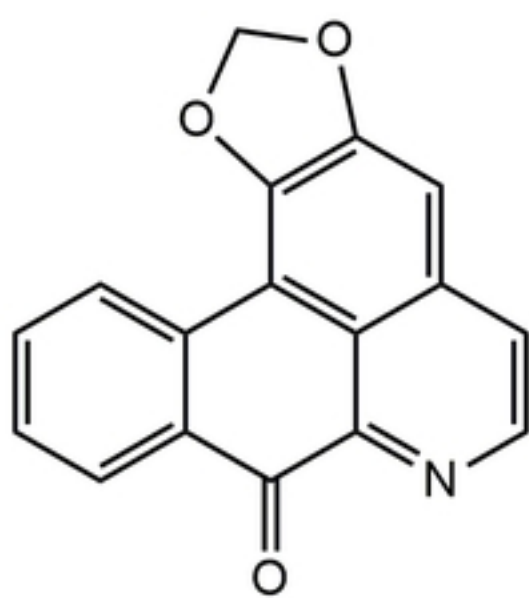

Liriodenine

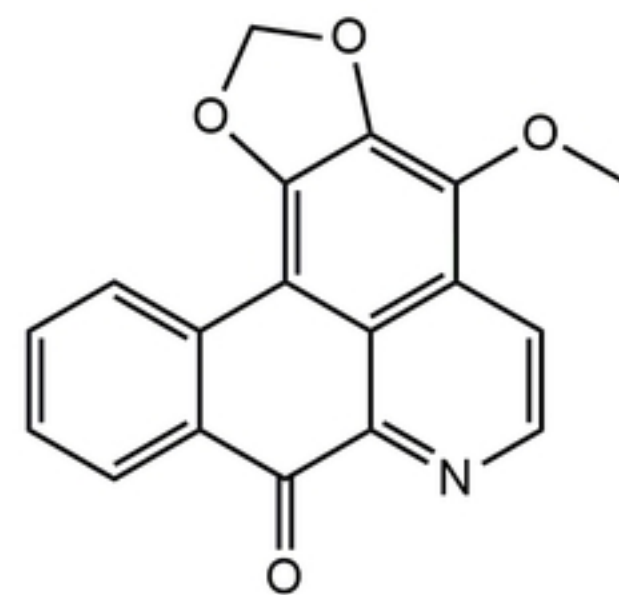

Atherospermidine

Figure 2

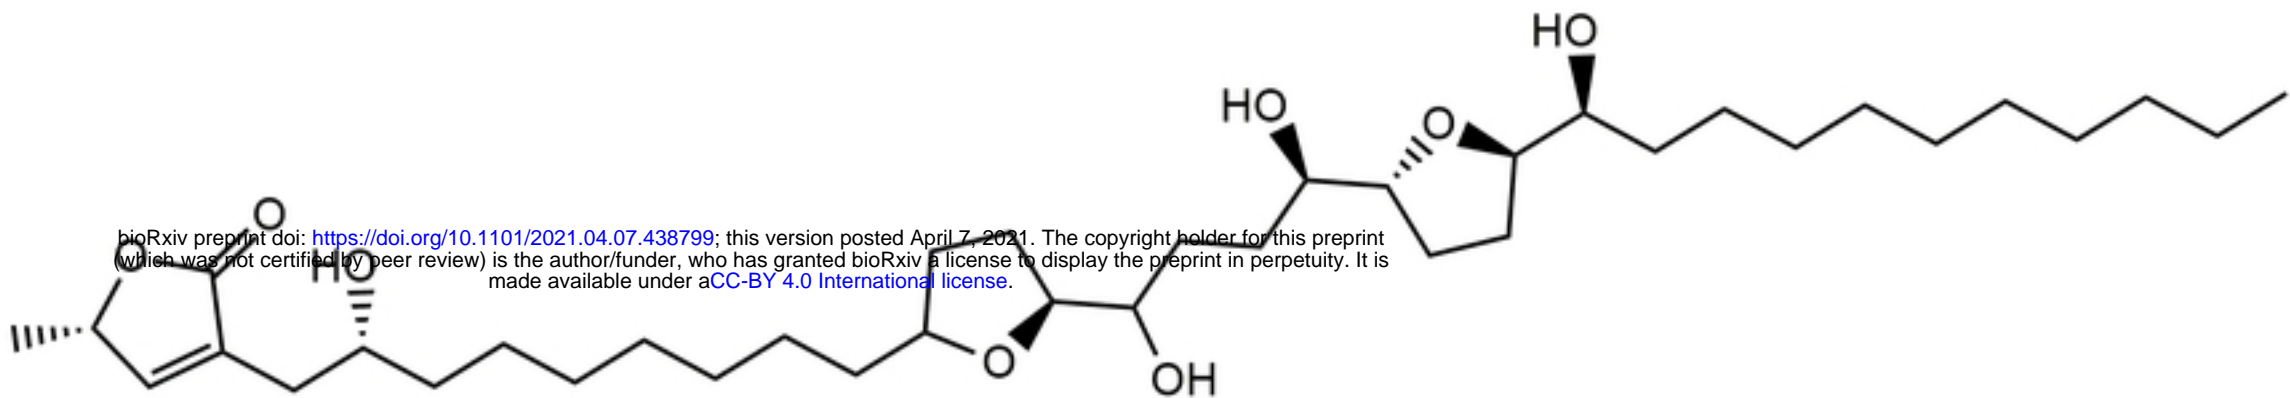

Bullatanocin

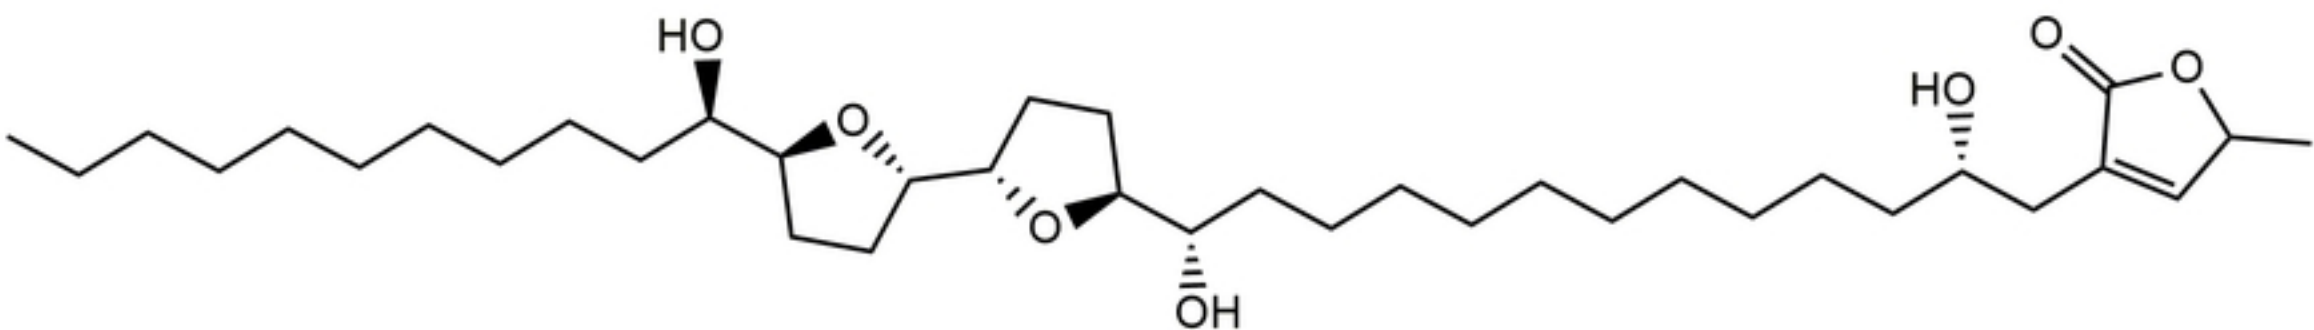

Bullatacin/squamocin

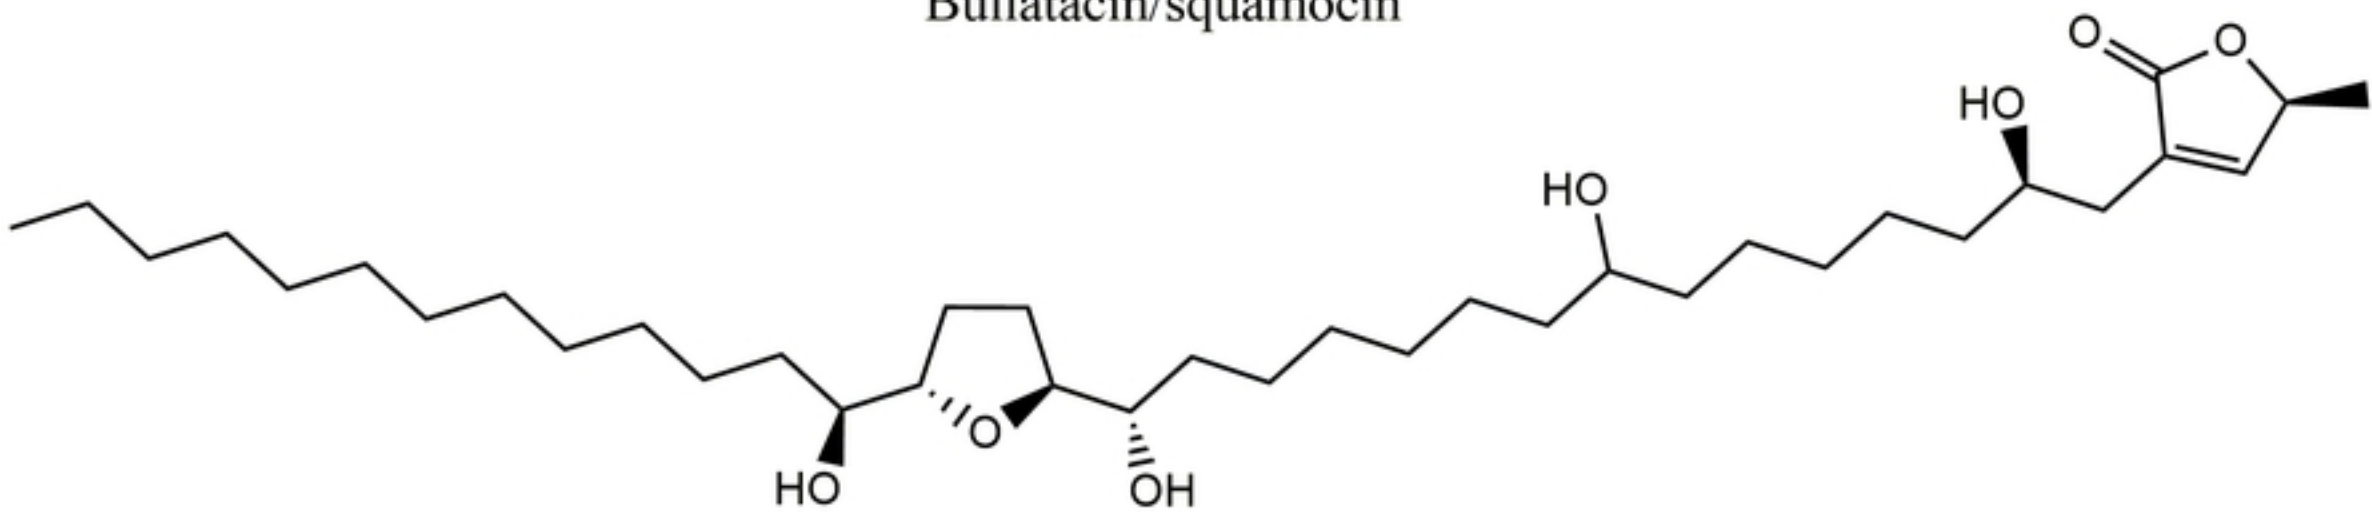

Annomontacin

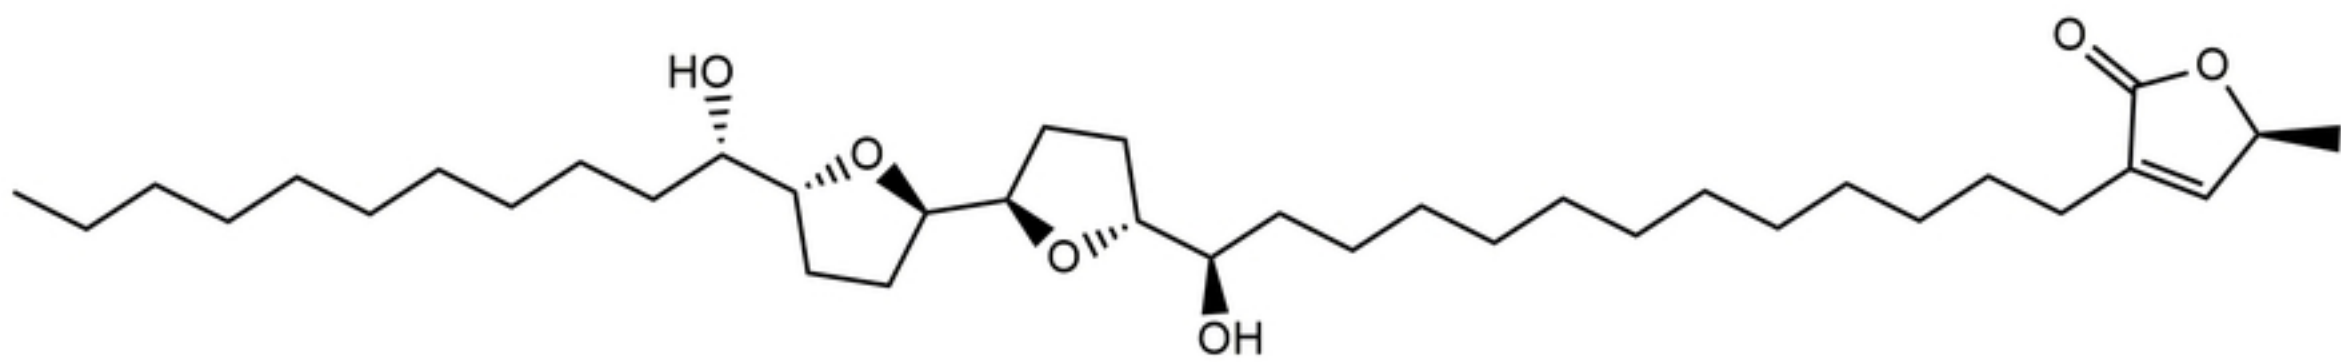

Desacetyluvaricin/ isodesacetyluvaricin



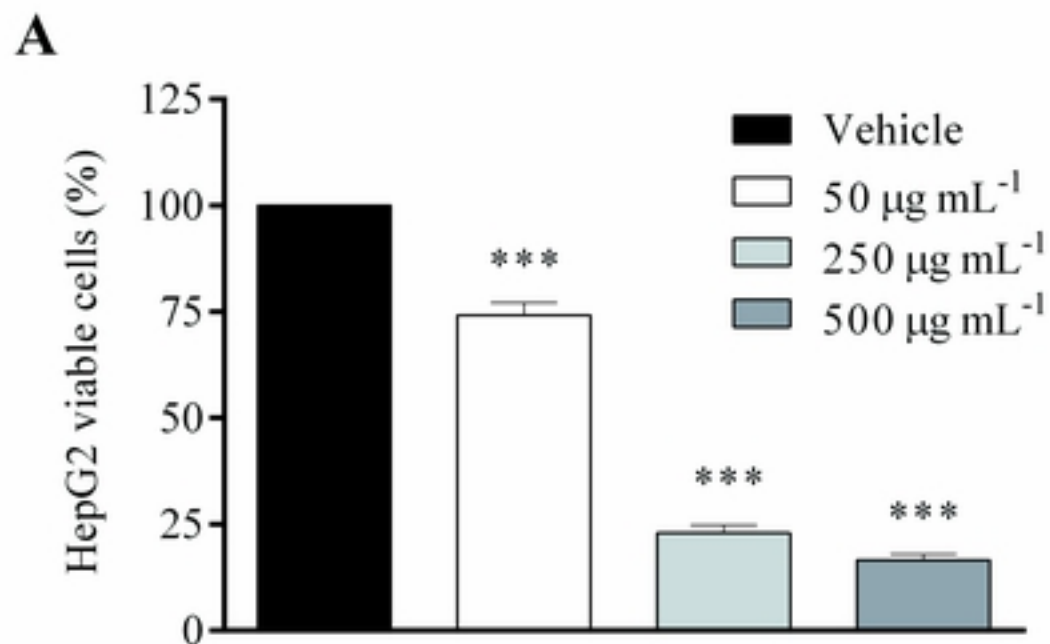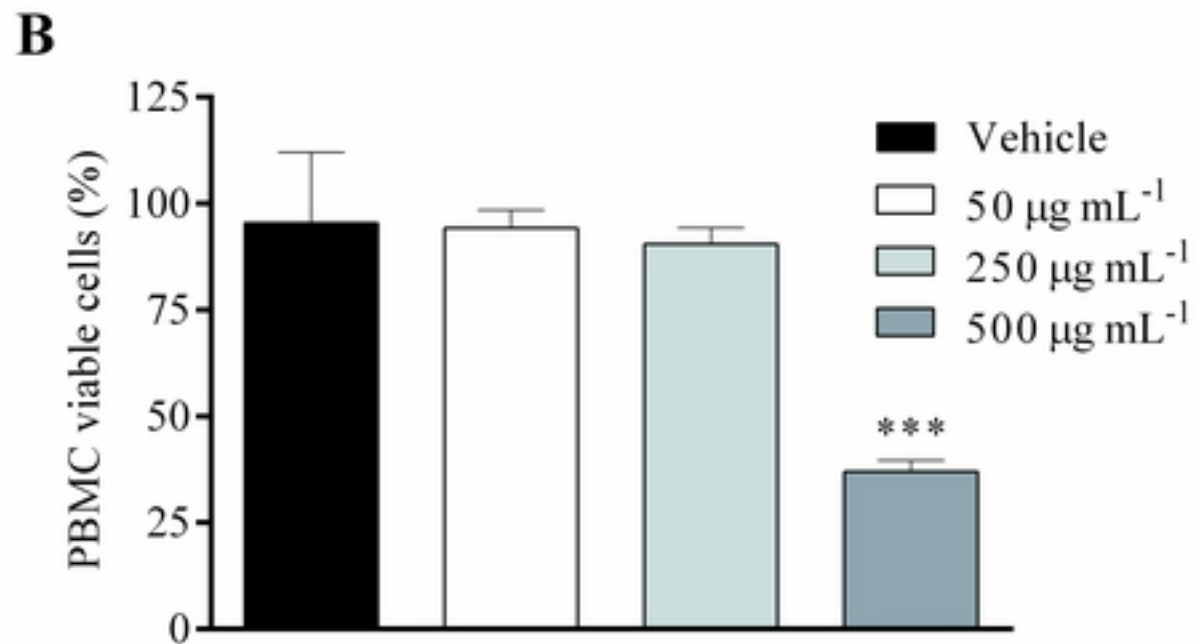

Figure 4

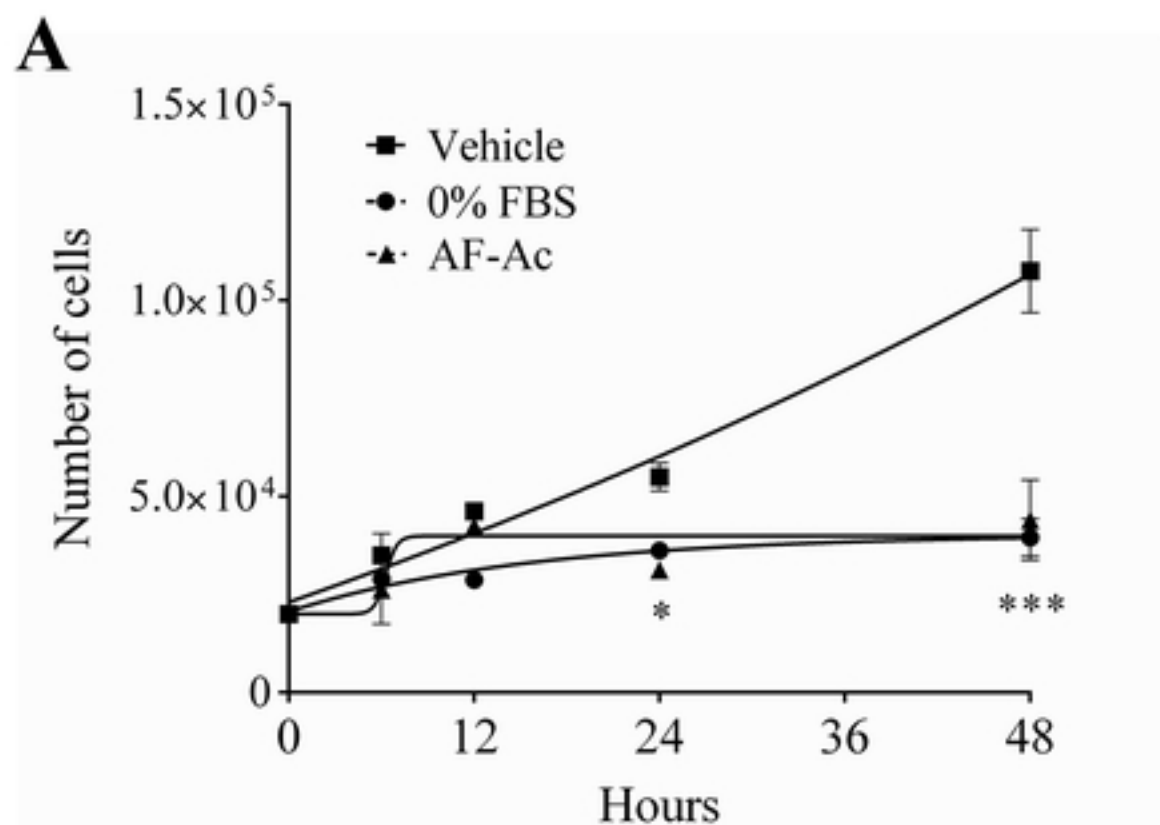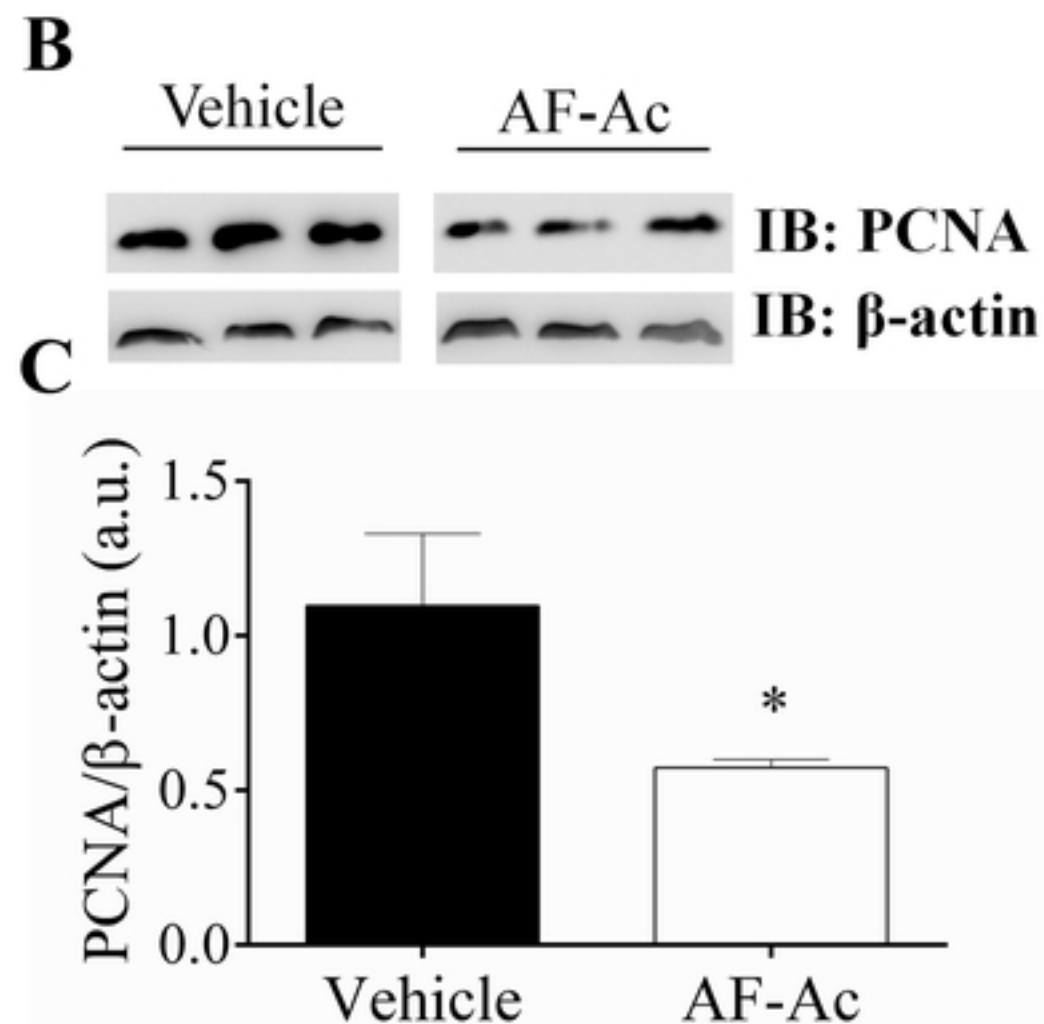

Figure 5

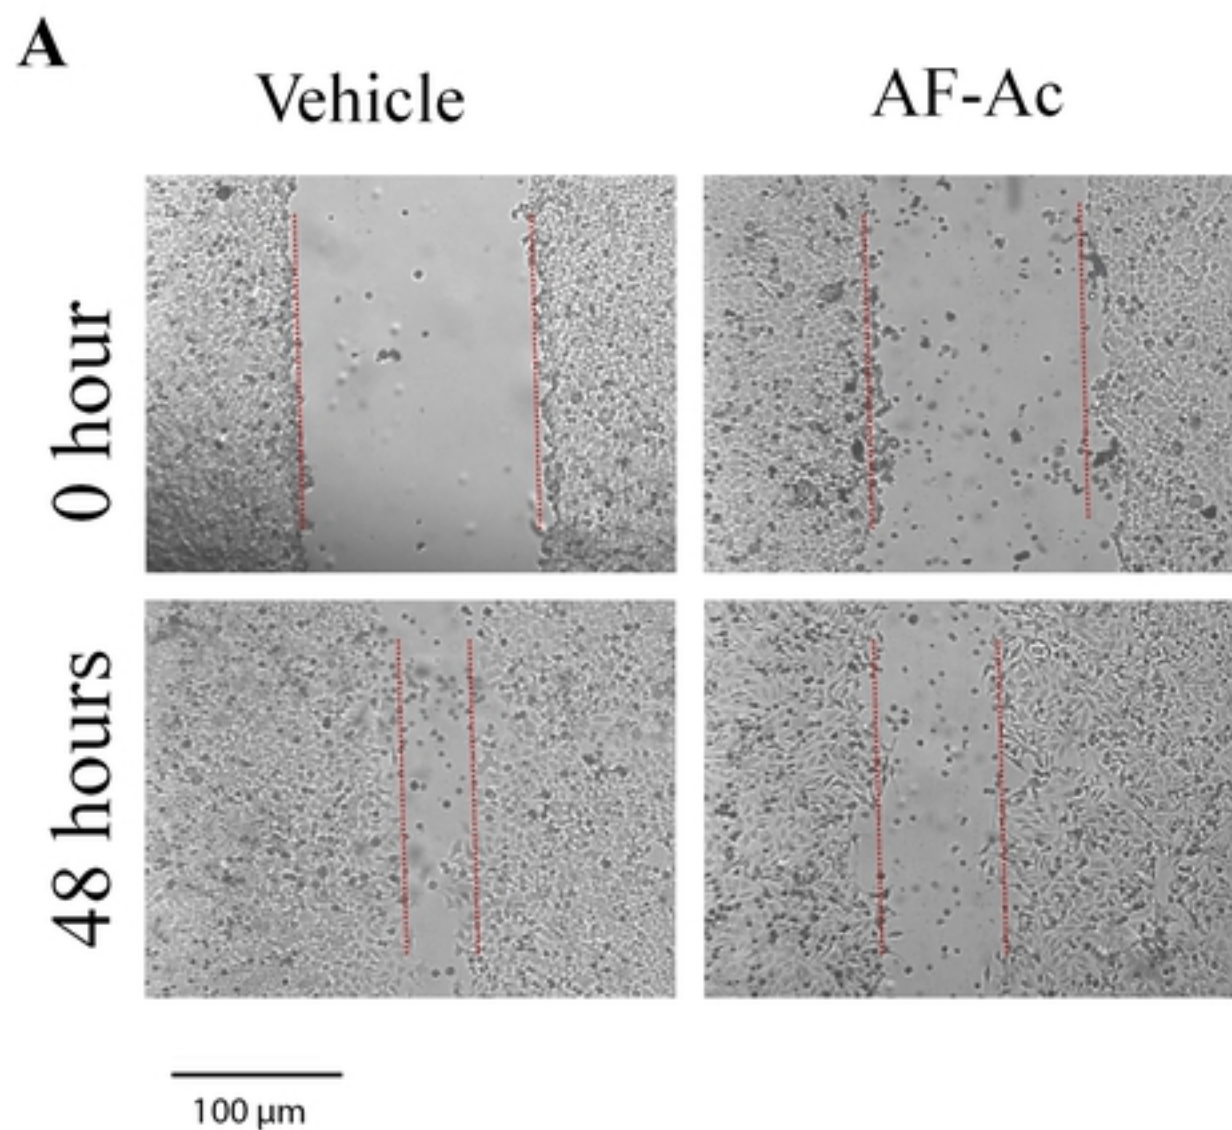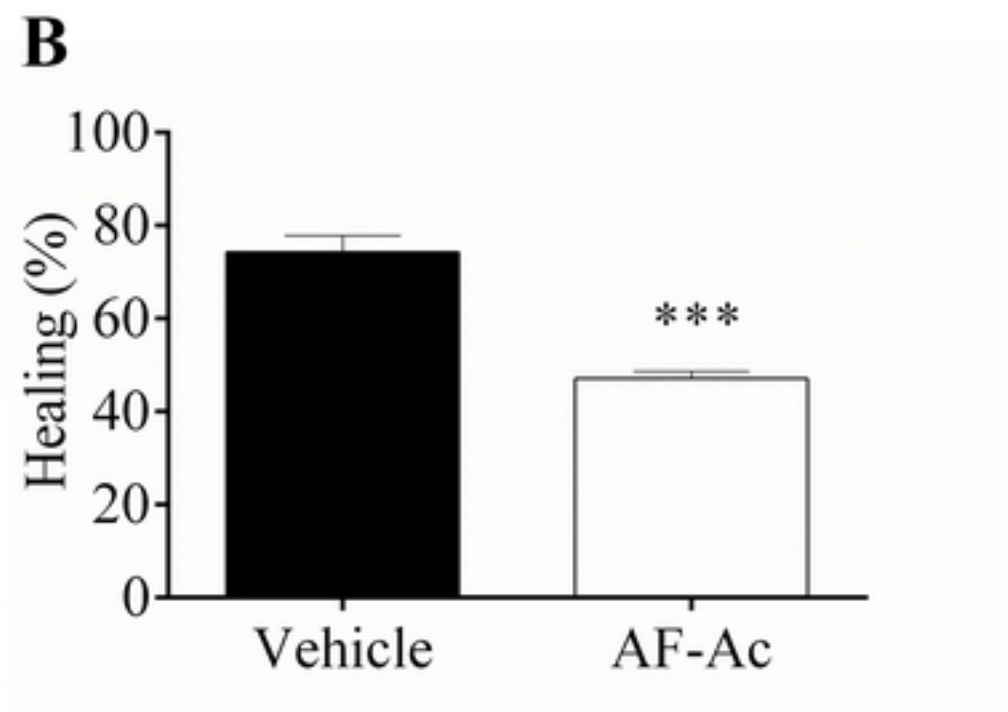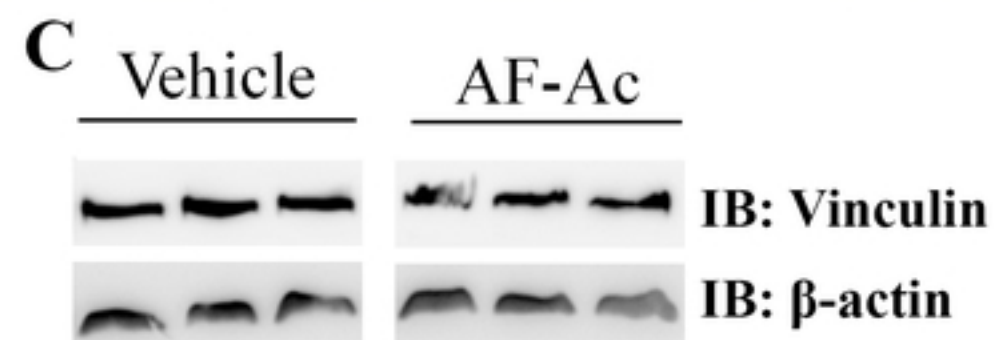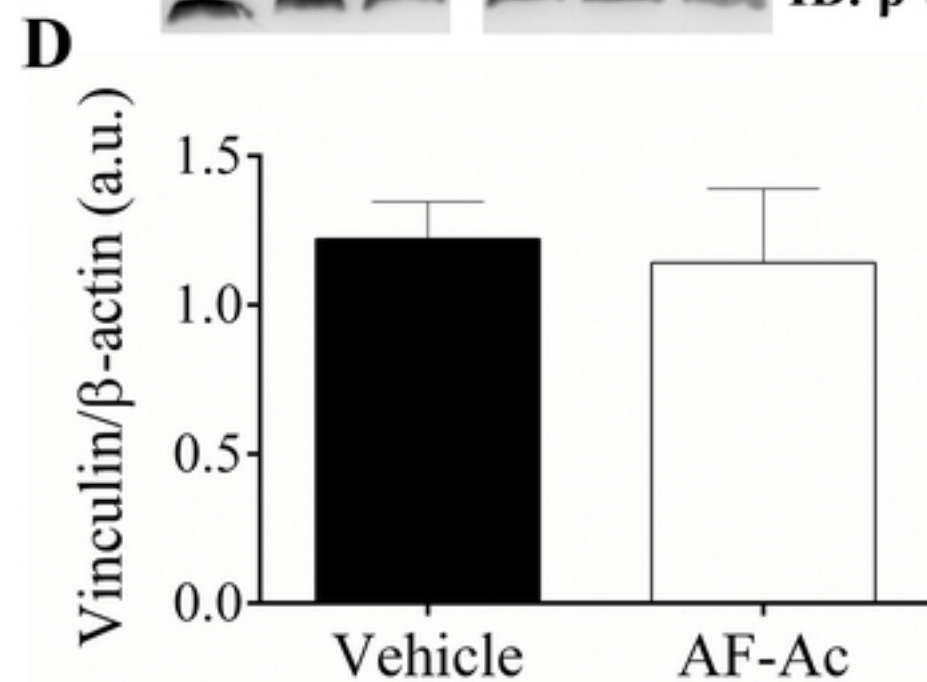

Figure 6

**A**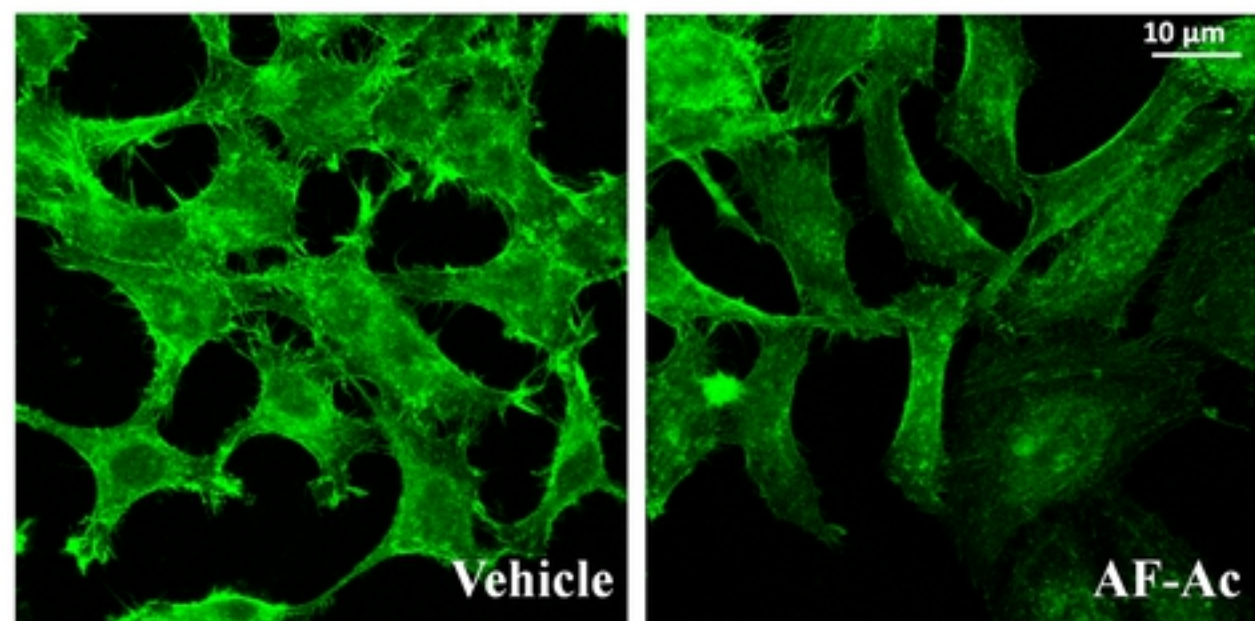**B**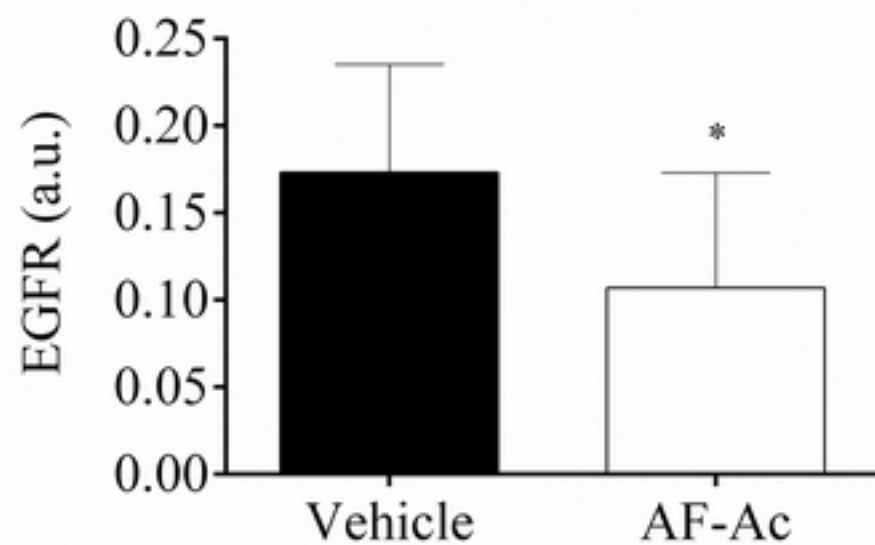**C**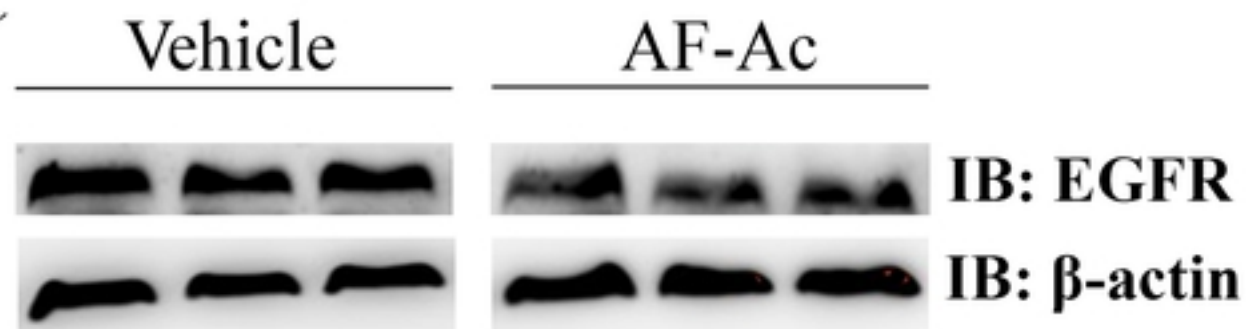**D**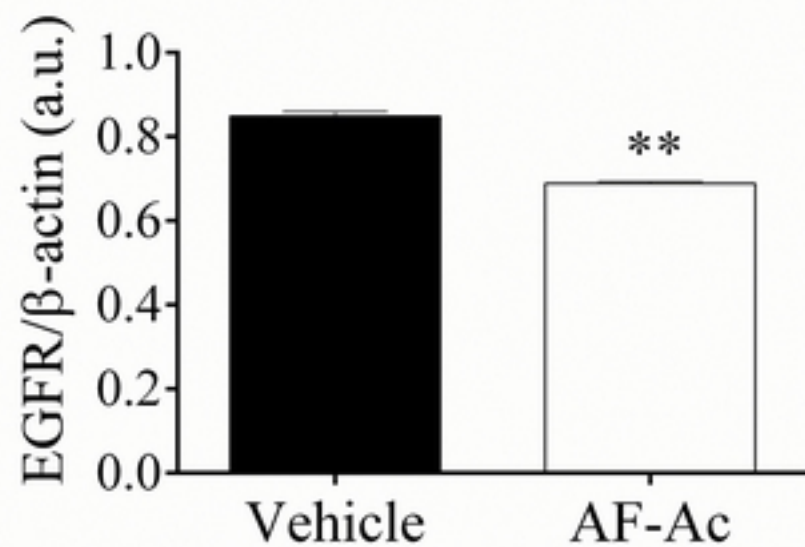

Figure 7

**A****+ AF-Ac**

bioRxiv preprint doi: <https://doi.org/10.1101/2021.04.07.438799>; this version posted April 7, 2021. The copyright holder for this preprint (which was not certified by peer review) is the author/funder, who has granted bioRxiv a license to display the preprint in perpetuity. It is made available under aCC-BY 4.0 International license.

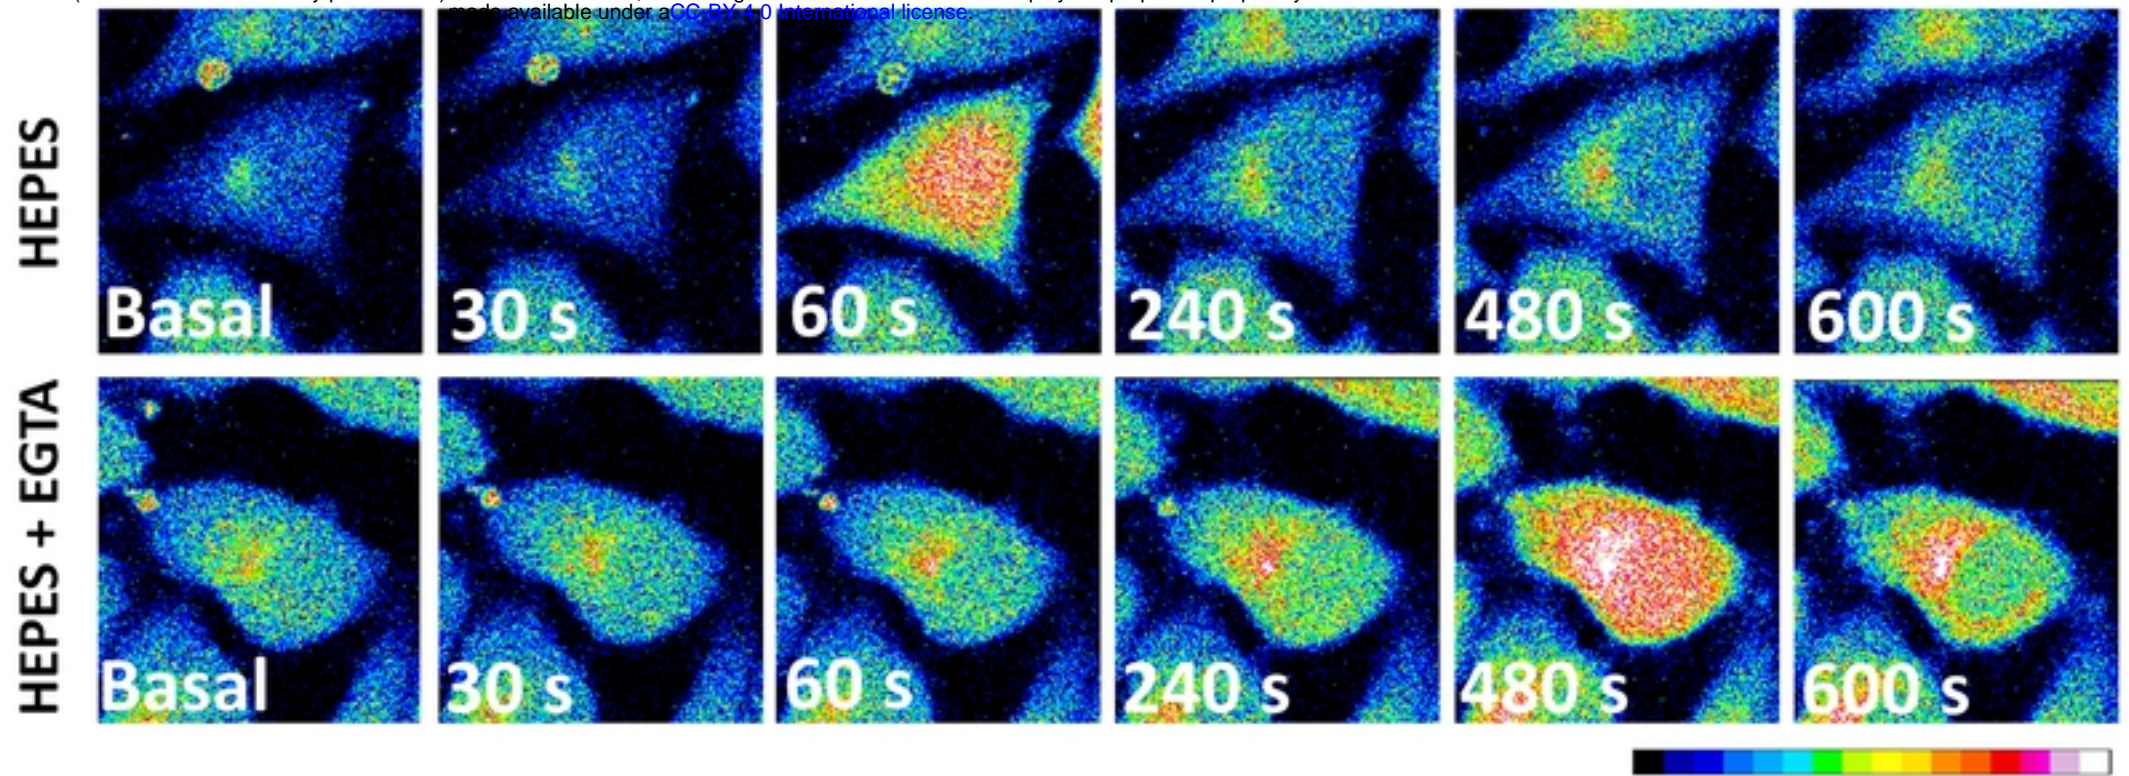**B**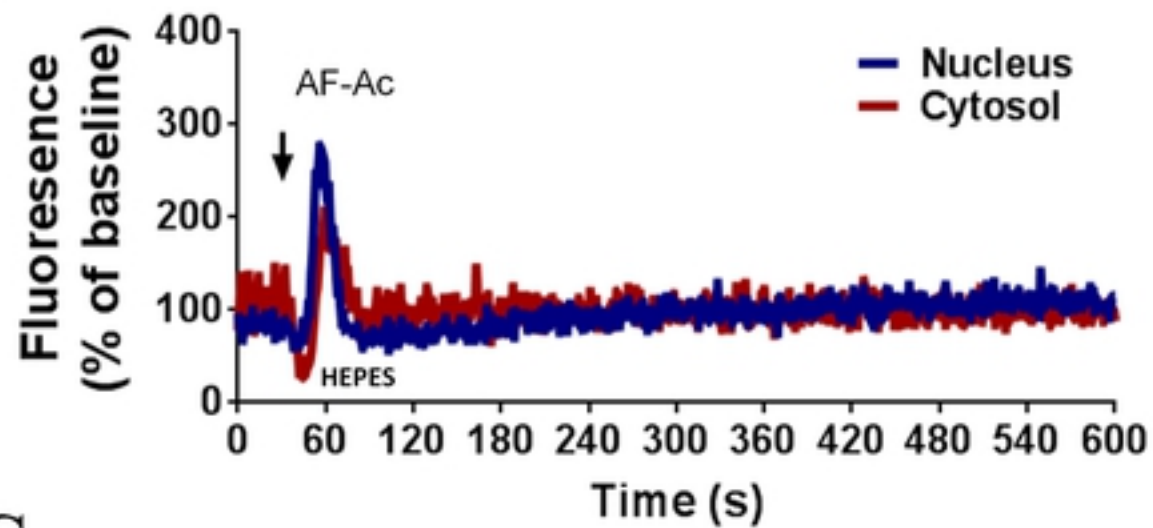**D**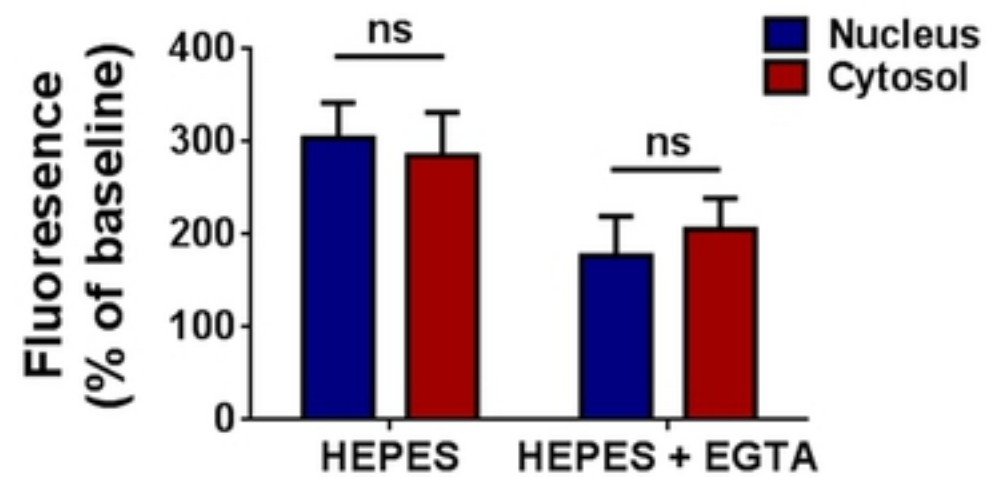**C**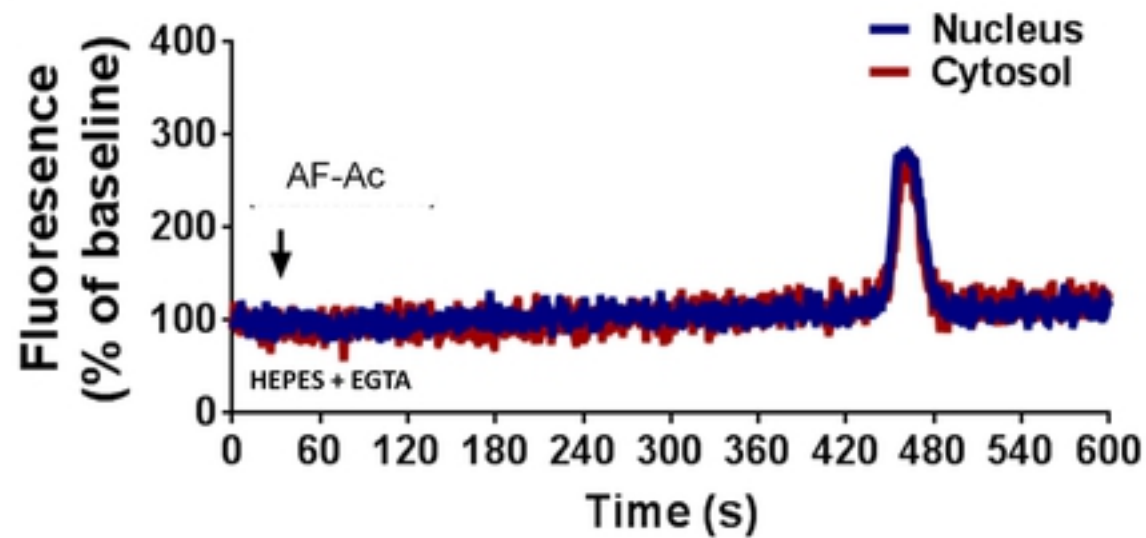

Figure 8
